# Supplementary material for: Predicting the geographical distributions of the macaque hosts and mosquito vectors of Plasmodium knowlesi malaria in forested and non-forested areas
Source: Parasit Vectors. 2016 Apr 28;9:242. doi: 10.1186/s13071-016-1527-0 (PMC4850754; doi:10.1186/s13071-016-1527-0)
Supplement: Additional file 9: — Macaca leonina data. Each record of M. leonina occurrence is provided with a location and date. Duplicate records within a calendar year have been removed. Locations are classed as points (defined as <25 km2) or polygons (defined as >25 km2). (XLSX 63 kb) [file 13071_2016_1527_MOESM9_ESM.xlsx]

## Sheet: Sheet1
Record_ID	Start_month	Start_year	End_month	End_year	Presence	Country	Site_name	Latitude	Longitude	Geometry_type	Release_status	Source1_ID	Source1	Source1_type	Source2_ID	Source2	Source2_type
404	3	2012	3	2012	1	Vietnam	la Tul, Gia Lai Province	13.4197	108.578	point	permission to release	pc	Covert, H. (2013) personal communiciation	pers_comm
405	2	2012	2	2012	1	Vietnam	Binh Chau - Phuoc Buu, Ba Ria - Vang Tau	10.5244	107.478	point	permission to release	pc	Covert, H. (2013) personal communiciation	pers_comm
406	3	2013	3	2013	1	Vietnam	Site 1, Bu Dang, Binh Phuoc	11.8132	107.353	point	permission to release	pc	Covert, H. (2013) personal communiciation	pers_comm
407	3	2013	3	2013	1	Vietnam	Site 2, Bu Dang, Binh Phuoc	11.8384	107.389	point	permission to release	pc	Covert, H. (2013) personal communiciation	pers_comm
408	5	2013	5	2013	1	Vietnam	Site 1, Bu Dop, Binh Phuoc	12.0177	106.908	point	permission to release	pc	Covert, H. (2013) personal communiciation	pers_comm
409	4	2012	4	2012	1	Vietnam	Site 2, Bu Dop, Binh Phuoc	12.0032	106.916	point	permission to release	pc	Covert, H. (2013) personal communiciation	pers_comm
410	11	2012	11	2012	1	Vietnam	Site 1, Lo Go - Xa Mat, Tay Ninh	11.5795	105.875	point	permission to release	pc	Covert, H. (2013) personal communiciation	pers_comm
411	1	2013	1	2013	1	Vietnam	Site 2, Lo Go - Xa Mat, Tay Ninh	11.6214	105.862	point	permission to release	pc	Covert, H. (2013) personal communiciation	pers_comm
198	2	2011	10	2011	1	Cambodia	Phnom Prich Wildlife Sanctuary, Mondulkiri Province, camera1	12.673019846	106.951941504	point	permission to release	pc	Gray, T., WWF-Cambodia & the Forestry Administration and Ministry of the Environment of the Royal Cambodian Government (2013) personal communication	pers_comm	370	Gray, T.N.E. & Phan, C. 2011 Habitat Preferences and Activity Patterns of the Larger Mammal Community in Phnom Prich Wildlife Sanctuary, Cambodia. Raffles Bull. Zool. 59, 311-318.	peer_rev_pub
199	1	2012	1	2012	1	Cambodia	Phnom Prich Wildlife Sanctuary, Mondulkiri Province, camera2	12.6940785470001	107.047976159	point	permission to release	pc	Gray, T., WWF-Cambodia & the Forestry Administration and Ministry of the Environment of the Royal Cambodian Government (2013) personal communication	pers_comm	370	Gray, T.N.E. & Phan, C. 2011 Habitat Preferences and Activity Patterns of the Larger Mammal Community in Phnom Prich Wildlife Sanctuary, Cambodia. Raffles Bull. Zool. 59, 311-318.	peer_rev_pub
200	2	2012	2	2012	1	Cambodia	Phnom Prich Wildlife Sanctuary, Mondulkiri Province, camera3	12.6945088730001	106.995021513	point	permission to release	pc	Gray, T., WWF-Cambodia & the Forestry Administration and Ministry of the Environment of the Royal Cambodian Government (2013) personal communication	pers_comm	370	Gray, T.N.E. & Phan, C. 2011 Habitat Preferences and Activity Patterns of the Larger Mammal Community in Phnom Prich Wildlife Sanctuary, Cambodia. Raffles Bull. Zool. 59, 311-318.	peer_rev_pub
201	5	2011	5	2011	1	Cambodia	Phnom Prich Wildlife Sanctuary, Mondulkiri Province, camera4	12.6968411460001	107.038967899	point	permission to release	pc	Gray, T., WWF-Cambodia & the Forestry Administration and Ministry of the Environment of the Royal Cambodian Government (2013) personal communication	pers_comm	370	Gray, T.N.E. & Phan, C. 2011 Habitat Preferences and Activity Patterns of the Larger Mammal Community in Phnom Prich Wildlife Sanctuary, Cambodia. Raffles Bull. Zool. 59, 311-318.	peer_rev_pub
202	5	2009	5	2009	1	Cambodia	Phnom Prich Wildlife Sanctuary, Mondulkiri Province, camera5	12.697504264	107.033818198	point	permission to release	pc	Gray, T., WWF-Cambodia & the Forestry Administration and Ministry of the Environment of the Royal Cambodian Government (2013) personal communication	pers_comm	370	Gray, T.N.E. & Phan, C. 2011 Habitat Preferences and Activity Patterns of the Larger Mammal Community in Phnom Prich Wildlife Sanctuary, Cambodia. Raffles Bull. Zool. 59, 311-318.	peer_rev_pub
203	5	2011	5	2011	1	Cambodia	Phnom Prich Wildlife Sanctuary, Mondulkiri Province, camera6	12.7048662830001	107.039022667	point	permission to release	pc	Gray, T., WWF-Cambodia & the Forestry Administration and Ministry of the Environment of the Royal Cambodian Government (2013) personal communication	pers_comm	370	Gray, T.N.E. & Phan, C. 2011 Habitat Preferences and Activity Patterns of the Larger Mammal Community in Phnom Prich Wildlife Sanctuary, Cambodia. Raffles Bull. Zool. 59, 311-318.	peer_rev_pub
204	5	2012	5	2012	1	Cambodia	Phnom Prich Wildlife Sanctuary, Mondulkiri Province, camera7	12.708539296	106.933542171	point	permission to release	pc	Gray, T., WWF-Cambodia & the Forestry Administration and Ministry of the Environment of the Royal Cambodian Government (2013) personal communication	pers_comm	370	Gray, T.N.E. & Phan, C. 2011 Habitat Preferences and Activity Patterns of the Larger Mammal Community in Phnom Prich Wildlife Sanctuary, Cambodia. Raffles Bull. Zool. 59, 311-318.	peer_rev_pub
205	12	2011	12	2011	1	Cambodia	Phnom Prich Wildlife Sanctuary, Mondulkiri Province, camera8	12.7091102740001	107.000355183	point	permission to release	pc	Gray, T., WWF-Cambodia & the Forestry Administration and Ministry of the Environment of the Royal Cambodian Government (2013) personal communication	pers_comm	370	Gray, T.N.E. & Phan, C. 2011 Habitat Preferences and Activity Patterns of the Larger Mammal Community in Phnom Prich Wildlife Sanctuary, Cambodia. Raffles Bull. Zool. 59, 311-318.	peer_rev_pub
206	12	2011	12	2011	1	Cambodia	Phnom Prich Wildlife Sanctuary, Mondulkiri Province, camera9	12.7124200710001	107.014429473	point	permission to release	pc	Gray, T., WWF-Cambodia & the Forestry Administration and Ministry of the Environment of the Royal Cambodian Government (2013) personal communication	pers_comm	370	Gray, T.N.E. & Phan, C. 2011 Habitat Preferences and Activity Patterns of the Larger Mammal Community in Phnom Prich Wildlife Sanctuary, Cambodia. Raffles Bull. Zool. 59, 311-318.	peer_rev_pub
207	8	2012	8	2012	1	Cambodia	Phnom Prich Wildlife Sanctuary, Mondulkiri Province, camera10	12.7136632090001	107.029187268	point	permission to release	pc	Gray, T., WWF-Cambodia & the Forestry Administration and Ministry of the Environment of the Royal Cambodian Government (2013) personal communication	pers_comm	370	Gray, T.N.E. & Phan, C. 2011 Habitat Preferences and Activity Patterns of the Larger Mammal Community in Phnom Prich Wildlife Sanctuary, Cambodia. Raffles Bull. Zool. 59, 311-318.	peer_rev_pub
208	7	2011	7	2011	1	Cambodia	Phnom Prich Wildlife Sanctuary, Mondulkiri Province, camera11	12.724491179	107.043211645	point	permission to release	pc	Gray, T., WWF-Cambodia & the Forestry Administration and Ministry of the Environment of the Royal Cambodian Government (2013) personal communication	pers_comm	370	Gray, T.N.E. & Phan, C. 2011 Habitat Preferences and Activity Patterns of the Larger Mammal Community in Phnom Prich Wildlife Sanctuary, Cambodia. Raffles Bull. Zool. 59, 311-318.	peer_rev_pub
209	2	2011	2	2011	1	Cambodia	Phnom Prich Wildlife Sanctuary, Mondulkiri Province, camera12	12.7263154400001	107.041044344	point	permission to release	pc	Gray, T., WWF-Cambodia & the Forestry Administration and Ministry of the Environment of the Royal Cambodian Government (2013) personal communication	pers_comm	370	Gray, T.N.E. & Phan, C. 2011 Habitat Preferences and Activity Patterns of the Larger Mammal Community in Phnom Prich Wildlife Sanctuary, Cambodia. Raffles Bull. Zool. 59, 311-318.	peer_rev_pub
210	4	2012	4	2012	1	Cambodia	Phnom Prich Wildlife Sanctuary, Mondulkiri Province, camera13	12.72733033	107.009971438	point	permission to release	pc	Gray, T., WWF-Cambodia & the Forestry Administration and Ministry of the Environment of the Royal Cambodian Government (2013) personal communication	pers_comm	370	Gray, T.N.E. & Phan, C. 2011 Habitat Preferences and Activity Patterns of the Larger Mammal Community in Phnom Prich Wildlife Sanctuary, Cambodia. Raffles Bull. Zool. 59, 311-318.	peer_rev_pub
211	2	2012	2	2012	1	Cambodia	Phnom Prich Wildlife Sanctuary, Mondulkiri Province, camera14	12.7354196470001	107.046484656	point	permission to release	pc	Gray, T., WWF-Cambodia & the Forestry Administration and Ministry of the Environment of the Royal Cambodian Government (2013) personal communication	pers_comm	370	Gray, T.N.E. & Phan, C. 2011 Habitat Preferences and Activity Patterns of the Larger Mammal Community in Phnom Prich Wildlife Sanctuary, Cambodia. Raffles Bull. Zool. 59, 311-318.	peer_rev_pub
212	3	2009	3	2009	1	Cambodia	Phnom Prich Wildlife Sanctuary, Mondulkiri Province, camera15	12.736073425	107.015463148	point	permission to release	pc	Gray, T., WWF-Cambodia & the Forestry Administration and Ministry of the Environment of the Royal Cambodian Government (2013) personal communication	pers_comm	370	Gray, T.N.E. & Phan, C. 2011 Habitat Preferences and Activity Patterns of the Larger Mammal Community in Phnom Prich Wildlife Sanctuary, Cambodia. Raffles Bull. Zool. 59, 311-318.	peer_rev_pub
213	1	2012	1	2012	1	Cambodia	Phnom Prich Wildlife Sanctuary, Mondulkiri Province, camera16	12.737642823	107.032425352	point	permission to release	pc	Gray, T., WWF-Cambodia & the Forestry Administration and Ministry of the Environment of the Royal Cambodian Government (2013) personal communication	pers_comm	370	Gray, T.N.E. & Phan, C. 2011 Habitat Preferences and Activity Patterns of the Larger Mammal Community in Phnom Prich Wildlife Sanctuary, Cambodia. Raffles Bull. Zool. 59, 311-318.	peer_rev_pub
214	5	2011	11	2011	1	Cambodia	Phnom Prich Wildlife Sanctuary, Mondulkiri Province, camera17	12.7393229730001	107.032540019	point	permission to release	pc	Gray, T., WWF-Cambodia & the Forestry Administration and Ministry of the Environment of the Royal Cambodian Government (2013) personal communication	pers_comm	370	Gray, T.N.E. & Phan, C. 2011 Habitat Preferences and Activity Patterns of the Larger Mammal Community in Phnom Prich Wildlife Sanctuary, Cambodia. Raffles Bull. Zool. 59, 311-318.	peer_rev_pub
215	1	2012	1	2012	1	Cambodia	Phnom Prich Wildlife Sanctuary, Mondulkiri Province, camera18	12.746430344	106.985658188	point	permission to release	pc	Gray, T., WWF-Cambodia & the Forestry Administration and Ministry of the Environment of the Royal Cambodian Government (2013) personal communication	pers_comm	370	Gray, T.N.E. & Phan, C. 2011 Habitat Preferences and Activity Patterns of the Larger Mammal Community in Phnom Prich Wildlife Sanctuary, Cambodia. Raffles Bull. Zool. 59, 311-318.	peer_rev_pub
216	5	2009	5	2009	1	Cambodia	Phnom Prich Wildlife Sanctuary, Mondulkiri Province, camera19	12.7473292920001	106.942500435	point	permission to release	pc	Gray, T., WWF-Cambodia & the Forestry Administration and Ministry of the Environment of the Royal Cambodian Government (2013) personal communication	pers_comm	370	Gray, T.N.E. & Phan, C. 2011 Habitat Preferences and Activity Patterns of the Larger Mammal Community in Phnom Prich Wildlife Sanctuary, Cambodia. Raffles Bull. Zool. 59, 311-318.	peer_rev_pub
217	5	2009	6	2009	1	Cambodia	Phnom Prich Wildlife Sanctuary, Mondulkiri Province, camera20	12.747712107	106.983467605	point	permission to release	pc	Gray, T., WWF-Cambodia & the Forestry Administration and Ministry of the Environment of the Royal Cambodian Government (2013) personal communication	pers_comm	370	Gray, T.N.E. & Phan, C. 2011 Habitat Preferences and Activity Patterns of the Larger Mammal Community in Phnom Prich Wildlife Sanctuary, Cambodia. Raffles Bull. Zool. 59, 311-318.	peer_rev_pub
218	2	2012	2	2012	1	Cambodia	Phnom Prich Wildlife Sanctuary, Mondulkiri Province, camera21	12.7483671430001	107.044609066	point	permission to release	pc	Gray, T., WWF-Cambodia & the Forestry Administration and Ministry of the Environment of the Royal Cambodian Government (2013) personal communication	pers_comm	370	Gray, T.N.E. & Phan, C. 2011 Habitat Preferences and Activity Patterns of the Larger Mammal Community in Phnom Prich Wildlife Sanctuary, Cambodia. Raffles Bull. Zool. 59, 311-318.	peer_rev_pub
219	10	2012	12	2011	1	Cambodia	Phnom Prich Wildlife Sanctuary, Mondulkiri Province, camera22	12.749051249	107.029717324	point	permission to release	pc	Gray, T., WWF-Cambodia & the Forestry Administration and Ministry of the Environment of the Royal Cambodian Government (2013) personal communication	pers_comm	370	Gray, T.N.E. & Phan, C. 2011 Habitat Preferences and Activity Patterns of the Larger Mammal Community in Phnom Prich Wildlife Sanctuary, Cambodia. Raffles Bull. Zool. 59, 311-318.	peer_rev_pub
220	1	2009	1	2009	1	Cambodia	Phnom Prich Wildlife Sanctuary, Mondulkiri Province, camera23	12.749552529	107.013801918	point	permission to release	pc	Gray, T., WWF-Cambodia & the Forestry Administration and Ministry of the Environment of the Royal Cambodian Government (2013) personal communication	pers_comm	370	Gray, T.N.E. & Phan, C. 2011 Habitat Preferences and Activity Patterns of the Larger Mammal Community in Phnom Prich Wildlife Sanctuary, Cambodia. Raffles Bull. Zool. 59, 311-318.	peer_rev_pub
221	7	2009	7	2009	1	Cambodia	Phnom Prich Wildlife Sanctuary, Mondulkiri Province, camera24	12.7567734890001	106.999559569	point	permission to release	pc	Gray, T., WWF-Cambodia & the Forestry Administration and Ministry of the Environment of the Royal Cambodian Government (2013) personal communication	pers_comm	370	Gray, T.N.E. & Phan, C. 2011 Habitat Preferences and Activity Patterns of the Larger Mammal Community in Phnom Prich Wildlife Sanctuary, Cambodia. Raffles Bull. Zool. 59, 311-318.	peer_rev_pub
222	3	2012	5	2012	1	Cambodia	Phnom Prich Wildlife Sanctuary, Mondulkiri Province, camera25	12.8059779930001	106.999302118	point	permission to release	pc	Gray, T., WWF-Cambodia & the Forestry Administration and Ministry of the Environment of the Royal Cambodian Government (2013) personal communication	pers_comm	370	Gray, T.N.E. & Phan, C. 2011 Habitat Preferences and Activity Patterns of the Larger Mammal Community in Phnom Prich Wildlife Sanctuary, Cambodia. Raffles Bull. Zool. 59, 311-318.	peer_rev_pub
223	12	2008	12	2008	1	Cambodia	Phnom Prich Wildlife Sanctuary, Mondulkiri Province, camera26	12.921622939	107.221203452	point	permission to release	pc	Gray, T., WWF-Cambodia & the Forestry Administration and Ministry of the Environment of the Royal Cambodian Government (2013) personal communication	pers_comm	370	Gray, T.N.E. & Phan, C. 2011 Habitat Preferences and Activity Patterns of the Larger Mammal Community in Phnom Prich Wildlife Sanctuary, Cambodia. Raffles Bull. Zool. 59, 311-318.	peer_rev_pub
224	6	2009	6	2009	1	Cambodia	Phnom Prich Wildlife Sanctuary, Mondulkiri Province, camera27	13.0057306320001	107.399468787	point	permission to release	pc	Gray, T., WWF-Cambodia & the Forestry Administration and Ministry of the Environment of the Royal Cambodian Government (2013) personal communication	pers_comm	370	Gray, T.N.E. & Phan, C. 2011 Habitat Preferences and Activity Patterns of the Larger Mammal Community in Phnom Prich Wildlife Sanctuary, Cambodia. Raffles Bull. Zool. 59, 311-318.	peer_rev_pub
225	7	2009	7	2009	1	Cambodia	Phnom Prich Wildlife Sanctuary, Mondulkiri Province, camera28	13.0243630160001	107.388599009	point	permission to release	pc	Gray, T., WWF-Cambodia & the Forestry Administration and Ministry of the Environment of the Royal Cambodian Government (2013) personal communication	pers_comm	370	Gray, T.N.E. & Phan, C. 2011 Habitat Preferences and Activity Patterns of the Larger Mammal Community in Phnom Prich Wildlife Sanctuary, Cambodia. Raffles Bull. Zool. 59, 311-318.	peer_rev_pub
432	3	2012	3	2012	1	Vietnam	Gia Lai	13.4197	108.578	point	permission to release	pc	Hoang, D.M., Tran, B.V. and Covert, H.H. (2014) personal communication	pers_comm	495	Hoang, D.M., Tran, B.V., Covert, H.H., Truong, L.H. & Toan, T.Q. 2010 Conservation Status of Primates in Ta Kou Nature Reserve. In Conservation Primates in Indochina (eds. T. Nadler, B.M. Rawson & V.N. Thinh), p. 288. Hanoi, Frankfurt Zoological Society and Conservation International.	book_chapter
433	2	2012	2	2012	1	Vietnam	Ba Ria - Vung Tau	10.5244	107.478	point	permission to release	pc	Hoang, D.M., Tran, B.V. and Covert, H.H. (2014) personal communication	pers_comm	495	Hoang, D.M., Tran, B.V., Covert, H.H., Truong, L.H. & Toan, T.Q. 2010 Conservation Status of Primates in Ta Kou Nature Reserve. In Conservation Primates in Indochina (eds. T. Nadler, B.M. Rawson & V.N. Thinh), p. 288. Hanoi, Frankfurt Zoological Society and Conservation International.	book_chapter
434	3	2013	3	2013	1	Vietnam	Binh Phuoc	11.8132	107.353	point	permission to release	pc	Hoang, D.M., Tran, B.V. and Covert, H.H. (2014) personal communication	pers_comm	495	Hoang, D.M., Tran, B.V., Covert, H.H., Truong, L.H. & Toan, T.Q. 2010 Conservation Status of Primates in Ta Kou Nature Reserve. In Conservation Primates in Indochina (eds. T. Nadler, B.M. Rawson & V.N. Thinh), p. 288. Hanoi, Frankfurt Zoological Society and Conservation International.	book_chapter
435	3	2013	3	2013	1	Vietnam	Binh Phuoc	11.8384	107.389	point	permission to release	pc	Hoang, D.M., Tran, B.V. and Covert, H.H. (2014) personal communication	pers_comm	495	Hoang, D.M., Tran, B.V., Covert, H.H., Truong, L.H. & Toan, T.Q. 2010 Conservation Status of Primates in Ta Kou Nature Reserve. In Conservation Primates in Indochina (eds. T. Nadler, B.M. Rawson & V.N. Thinh), p. 288. Hanoi, Frankfurt Zoological Society and Conservation International.	book_chapter
436	5	2013	5	2013	1	Vietnam	Binh Phuoc	12.0177	106.908	point	permission to release	pc	Hoang, D.M., Tran, B.V. and Covert, H.H. (2014) personal communication	pers_comm	495	Hoang, D.M., Tran, B.V., Covert, H.H., Truong, L.H. & Toan, T.Q. 2010 Conservation Status of Primates in Ta Kou Nature Reserve. In Conservation Primates in Indochina (eds. T. Nadler, B.M. Rawson & V.N. Thinh), p. 288. Hanoi, Frankfurt Zoological Society and Conservation International.	book_chapter
437	4	2012	4	2012	1	Vietnam	Binh Phuoc	12.0032	106.916	point	permission to release	pc	Hoang, D.M., Tran, B.V. and Covert, H.H. (2014) personal communication	pers_comm	495	Hoang, D.M., Tran, B.V., Covert, H.H., Truong, L.H. & Toan, T.Q. 2010 Conservation Status of Primates in Ta Kou Nature Reserve. In Conservation Primates in Indochina (eds. T. Nadler, B.M. Rawson & V.N. Thinh), p. 288. Hanoi, Frankfurt Zoological Society and Conservation International.	book_chapter
438	11	2012	11	2012	1	Vietnam	Tay Ninh	11.5795	105.875	point	permission to release	pc	Hoang, D.M., Tran, B.V. and Covert, H.H. (2014) personal communication	pers_comm	495	Hoang, D.M., Tran, B.V., Covert, H.H., Truong, L.H. & Toan, T.Q. 2010 Conservation Status of Primates in Ta Kou Nature Reserve. In Conservation Primates in Indochina (eds. T. Nadler, B.M. Rawson & V.N. Thinh), p. 288. Hanoi, Frankfurt Zoological Society and Conservation International.	book_chapter
439	1	2013	1	2013	1	Vietnam	Tay Ninh	11.6214	105.862	point	permission to release	pc	Hoang, D.M., Tran, B.V. and Covert, H.H. (2014) personal communication	pers_comm	495	Hoang, D.M., Tran, B.V., Covert, H.H., Truong, L.H. & Toan, T.Q. 2010 Conservation Status of Primates in Ta Kou Nature Reserve. In Conservation Primates in Indochina (eds. T. Nadler, B.M. Rawson & V.N. Thinh), p. 288. Hanoi, Frankfurt Zoological Society and Conservation International.	book_chapter
440	7	2007	7	2007	1	Vietnam	Binh Phuoc	12.1915	107.203	point	permission to release	pc	Hoang, D.M., Tran, B.V. and Covert, H.H. (2014) personal communication	pers_comm	495	Hoang, D.M., Tran, B.V., Covert, H.H., Truong, L.H. & Toan, T.Q. 2010 Conservation Status of Primates in Ta Kou Nature Reserve. In Conservation Primates in Indochina (eds. T. Nadler, B.M. Rawson & V.N. Thinh), p. 288. Hanoi, Frankfurt Zoological Society and Conservation International.	book_chapter
441	1	2010	1	2010	1	Vietnam	Dong Nai	11.4283	107.424	point	permission to release	pc	O'Brien, J.A., Hoang, D.M., Tran, B.V. and Covert, H.H. (2014) personal communication	pers_comm	495	Hoang, D.M., Tran, B.V., Covert, H.H., Truong, L.H. & Toan, T.Q. 2010 Conservation Status of Primates in Ta Kou Nature Reserve. In Conservation Primates in Indochina (eds. T. Nadler, B.M. Rawson & V.N. Thinh), p. 288. Hanoi, Frankfurt Zoological Society and Conservation International.	book_chapter
160	12	2007	12	2007	1	Lao PDR	Site 1, Nakai-Nam Theun National Protected Area	17.8723	105.279	point	permission to release	pc	Coudrat, C. (2013) personal communication	pers_comm	746	Coudrat, C. & Nekaris, K.A.-I. 2013 Modelling Niche Differentiation of Co-Existing, Elusive and Morphologically Similar Species: A Case Study of Four Macaque Species in Nakai-Nam Theun National Protected Area, Laos. Animals 3, 45-62. (doi:10.3390/ani3010045).	peer_rev_pub
161	11	2007	11	2007	1	Lao PDR	Site 2, Nakai-Nam Theun National Protected Area	17.8176	105.323	point	permission to release	pc	Coudrat, C. (2013) personal communication	pers_comm	746	Coudrat, C. & Nekaris, K.A.-I. 2013 Modelling Niche Differentiation of Co-Existing, Elusive and Morphologically Similar Species: A Case Study of Four Macaque Species in Nakai-Nam Theun National Protected Area, Laos. Animals 3, 45-62. (doi:10.3390/ani3010045).	peer_rev_pub
162	11	2007	11	2007	1	Lao PDR	Site 3, Nakai-Nam Theun National Protected Area	17.8567	105.309	point	permission to release	pc	Coudrat, C. (2013) personal communication	pers_comm	746	Coudrat, C. & Nekaris, K.A.-I. 2013 Modelling Niche Differentiation of Co-Existing, Elusive and Morphologically Similar Species: A Case Study of Four Macaque Species in Nakai-Nam Theun National Protected Area, Laos. Animals 3, 45-62. (doi:10.3390/ani3010045).	peer_rev_pub
163	12	2007	12	2007	1	Lao PDR	Site 4, Nakai-Nam Theun National Protected Area	17.8181	105.31	point	permission to release	pc	Coudrat, C. (2013) personal communication	pers_comm	746	Coudrat, C. & Nekaris, K.A.-I. 2013 Modelling Niche Differentiation of Co-Existing, Elusive and Morphologically Similar Species: A Case Study of Four Macaque Species in Nakai-Nam Theun National Protected Area, Laos. Animals 3, 45-62. (doi:10.3390/ani3010045).	peer_rev_pub
164	12	2007	12	2007	1	Lao PDR	Site 5, Nakai-Nam Theun National Protected Area	17.8603	105.329	point	permission to release	pc	Coudrat, C. (2013) personal communication	pers_comm	746	Coudrat, C. & Nekaris, K.A.-I. 2013 Modelling Niche Differentiation of Co-Existing, Elusive and Morphologically Similar Species: A Case Study of Four Macaque Species in Nakai-Nam Theun National Protected Area, Laos. Animals 3, 45-62. (doi:10.3390/ani3010045).	peer_rev_pub
165	11	2007	11	2007	1	Lao PDR	Site 6, Nakai-Nam Theun National Protected Area	17.8458	105.32	point	permission to release	pc	Coudrat, C. (2013) personal communication	pers_comm	746	Coudrat, C. & Nekaris, K.A.-I. 2013 Modelling Niche Differentiation of Co-Existing, Elusive and Morphologically Similar Species: A Case Study of Four Macaque Species in Nakai-Nam Theun National Protected Area, Laos. Animals 3, 45-62. (doi:10.3390/ani3010045).	peer_rev_pub
166	11	2007	11	2007	1	Lao PDR	Site 7, Nakai-Nam Theun National Protected Area	17.8463	105.267	point	permission to release	pc	Coudrat, C. (2013) personal communication	pers_comm	746	Coudrat, C. & Nekaris, K.A.-I. 2013 Modelling Niche Differentiation of Co-Existing, Elusive and Morphologically Similar Species: A Case Study of Four Macaque Species in Nakai-Nam Theun National Protected Area, Laos. Animals 3, 45-62. (doi:10.3390/ani3010045).	peer_rev_pub
167	12	2007	12	2007	1	Lao PDR	Site 8, Nakai-Nam Theun National Protected Area	17.819	105.28	point	permission to release	pc	Coudrat, C. (2013) personal communication	pers_comm	746	Coudrat, C. & Nekaris, K.A.-I. 2013 Modelling Niche Differentiation of Co-Existing, Elusive and Morphologically Similar Species: A Case Study of Four Macaque Species in Nakai-Nam Theun National Protected Area, Laos. Animals 3, 45-62. (doi:10.3390/ani3010045).	peer_rev_pub
168	12	2007	12	2007	1	Lao PDR	Site 9, Nakai-Nam Theun National Protected Area	17.8205	105.291	point	permission to release	pc	Coudrat, C. (2013) personal communication	pers_comm	746	Coudrat, C. & Nekaris, K.A.-I. 2013 Modelling Niche Differentiation of Co-Existing, Elusive and Morphologically Similar Species: A Case Study of Four Macaque Species in Nakai-Nam Theun National Protected Area, Laos. Animals 3, 45-62. (doi:10.3390/ani3010045).	peer_rev_pub
169	12	2007	12	2007	1	Lao PDR	Site 10, Nakai-Nam Theun National Protected Area	17.8064	105.285	point	permission to release	pc	Coudrat, C. (2013) personal communication	pers_comm	746	Coudrat, C. & Nekaris, K.A.-I. 2013 Modelling Niche Differentiation of Co-Existing, Elusive and Morphologically Similar Species: A Case Study of Four Macaque Species in Nakai-Nam Theun National Protected Area, Laos. Animals 3, 45-62. (doi:10.3390/ani3010045).	peer_rev_pub
170	1	2008	1	2008	1	Lao PDR	Site 11, Nakai-Nam Theun National Protected Area	17.7783	105.315	point	permission to release	pc	Coudrat, C. (2013) personal communication	pers_comm	746	Coudrat, C. & Nekaris, K.A.-I. 2013 Modelling Niche Differentiation of Co-Existing, Elusive and Morphologically Similar Species: A Case Study of Four Macaque Species in Nakai-Nam Theun National Protected Area, Laos. Animals 3, 45-62. (doi:10.3390/ani3010045).	peer_rev_pub
171	12	2007	12	2007	1	Lao PDR	Site 12, Nakai-Nam Theun National Protected Area	17.776	105.327	point	permission to release	pc	Coudrat, C. (2013) personal communication	pers_comm	746	Coudrat, C. & Nekaris, K.A.-I. 2013 Modelling Niche Differentiation of Co-Existing, Elusive and Morphologically Similar Species: A Case Study of Four Macaque Species in Nakai-Nam Theun National Protected Area, Laos. Animals 3, 45-62. (doi:10.3390/ani3010045).	peer_rev_pub
172	3	2008	3	2008	1	Lao PDR	Site 13, Nakai-Nam Theun National Protected Area	17.8998	105.267	point	permission to release	pc	Coudrat, C. (2013) personal communication	pers_comm	746	Coudrat, C. & Nekaris, K.A.-I. 2013 Modelling Niche Differentiation of Co-Existing, Elusive and Morphologically Similar Species: A Case Study of Four Macaque Species in Nakai-Nam Theun National Protected Area, Laos. Animals 3, 45-62. (doi:10.3390/ani3010045).	peer_rev_pub
173	3	2008	3	2008	1	Lao PDR	Site 14, Nakai-Nam Theun National Protected Area	17.9263	105.251	point	permission to release	pc	Coudrat, C. (2013) personal communication	pers_comm	746	Coudrat, C. & Nekaris, K.A.-I. 2013 Modelling Niche Differentiation of Co-Existing, Elusive and Morphologically Similar Species: A Case Study of Four Macaque Species in Nakai-Nam Theun National Protected Area, Laos. Animals 3, 45-62. (doi:10.3390/ani3010045).	peer_rev_pub
174	3	2008	3	2008	1	Lao PDR	Site 15, Nakai-Nam Theun National Protected Area	17.8879	105.26	point	permission to release	pc	Coudrat, C. (2013) personal communication	pers_comm	746	Coudrat, C. & Nekaris, K.A.-I. 2013 Modelling Niche Differentiation of Co-Existing, Elusive and Morphologically Similar Species: A Case Study of Four Macaque Species in Nakai-Nam Theun National Protected Area, Laos. Animals 3, 45-62. (doi:10.3390/ani3010045).	peer_rev_pub
175	2	2008	2	2008	1	Lao PDR	Site 16, Nakai-Nam Theun National Protected Area	17.9125	105.286	point	permission to release	pc	Coudrat, C. (2013) personal communication	pers_comm	746	Coudrat, C. & Nekaris, K.A.-I. 2013 Modelling Niche Differentiation of Co-Existing, Elusive and Morphologically Similar Species: A Case Study of Four Macaque Species in Nakai-Nam Theun National Protected Area, Laos. Animals 3, 45-62. (doi:10.3390/ani3010045).	peer_rev_pub
176	11	2009	11	2009	1	Lao PDR	Site 17, Nakai-Nam Theun National Protected Area	17.6888	105.318	point	permission to release	pc	Coudrat, C. (2013) personal communication	pers_comm	746	Coudrat, C. & Nekaris, K.A.-I. 2013 Modelling Niche Differentiation of Co-Existing, Elusive and Morphologically Similar Species: A Case Study of Four Macaque Species in Nakai-Nam Theun National Protected Area, Laos. Animals 3, 45-62. (doi:10.3390/ani3010045).	peer_rev_pub
177	11	2009	11	2009	1	Lao PDR	Site 18, Nakai-Nam Theun National Protected Area	17.7199	105.331	point	permission to release	pc	Coudrat, C. (2013) personal communication	pers_comm	746	Coudrat, C. & Nekaris, K.A.-I. 2013 Modelling Niche Differentiation of Co-Existing, Elusive and Morphologically Similar Species: A Case Study of Four Macaque Species in Nakai-Nam Theun National Protected Area, Laos. Animals 3, 45-62. (doi:10.3390/ani3010045).	peer_rev_pub
178	11	2009	11	2009	1	Lao PDR	Site 19, Nakai-Nam Theun National Protected Area	17.7194	105.307	point	permission to release	pc	Coudrat, C. (2013) personal communication	pers_comm	746	Coudrat, C. & Nekaris, K.A.-I. 2013 Modelling Niche Differentiation of Co-Existing, Elusive and Morphologically Similar Species: A Case Study of Four Macaque Species in Nakai-Nam Theun National Protected Area, Laos. Animals 3, 45-62. (doi:10.3390/ani3010045).	peer_rev_pub
179	12	2009	12	2009	1	Lao PDR	Site 20, Nakai-Nam Theun National Protected Area	17.7035	105.329	point	permission to release	pc	Coudrat, C. (2013) personal communication	pers_comm	746	Coudrat, C. & Nekaris, K.A.-I. 2013 Modelling Niche Differentiation of Co-Existing, Elusive and Morphologically Similar Species: A Case Study of Four Macaque Species in Nakai-Nam Theun National Protected Area, Laos. Animals 3, 45-62. (doi:10.3390/ani3010045).	peer_rev_pub
180	12	2009	12	2009	1	Lao PDR	Site 21, Nakai-Nam Theun National Protected Area	17.7444	105.262	point	permission to release	pc	Coudrat, C. (2013) personal communication	pers_comm	746	Coudrat, C. & Nekaris, K.A.-I. 2013 Modelling Niche Differentiation of Co-Existing, Elusive and Morphologically Similar Species: A Case Study of Four Macaque Species in Nakai-Nam Theun National Protected Area, Laos. Animals 3, 45-62. (doi:10.3390/ani3010045).	peer_rev_pub
181	11	2009	11	2009	1	Lao PDR	Site 22, Nakai-Nam Theun National Protected Area	17.743	105.247	point	permission to release	pc	Coudrat, C. (2013) personal communication	pers_comm	746	Coudrat, C. & Nekaris, K.A.-I. 2013 Modelling Niche Differentiation of Co-Existing, Elusive and Morphologically Similar Species: A Case Study of Four Macaque Species in Nakai-Nam Theun National Protected Area, Laos. Animals 3, 45-62. (doi:10.3390/ani3010045).	peer_rev_pub
182	12	2009	12	2009	1	Lao PDR	Site 23, Nakai-Nam Theun National Protected Area	17.6776	105.329	point	permission to release	pc	Coudrat, C. (2013) personal communication	pers_comm	746	Coudrat, C. & Nekaris, K.A.-I. 2013 Modelling Niche Differentiation of Co-Existing, Elusive and Morphologically Similar Species: A Case Study of Four Macaque Species in Nakai-Nam Theun National Protected Area, Laos. Animals 3, 45-62. (doi:10.3390/ani3010045).	peer_rev_pub
183	11	2009	11	2009	1	Lao PDR	Site 24, Nakai-Nam Theun National Protected Area	17.7336	105.303	point	permission to release	pc	Coudrat, C. (2013) personal communication	pers_comm	746	Coudrat, C. & Nekaris, K.A.-I. 2013 Modelling Niche Differentiation of Co-Existing, Elusive and Morphologically Similar Species: A Case Study of Four Macaque Species in Nakai-Nam Theun National Protected Area, Laos. Animals 3, 45-62. (doi:10.3390/ani3010045).	peer_rev_pub
184	12	2009	12	2009	1	Lao PDR	Site 25, Nakai-Nam Theun National Protected Area	17.7044	105.316	point	permission to release	pc	Coudrat, C. (2013) personal communication	pers_comm	746	Coudrat, C. & Nekaris, K.A.-I. 2013 Modelling Niche Differentiation of Co-Existing, Elusive and Morphologically Similar Species: A Case Study of Four Macaque Species in Nakai-Nam Theun National Protected Area, Laos. Animals 3, 45-62. (doi:10.3390/ani3010045).	peer_rev_pub
185	11	2009	11	2009	1	Lao PDR	Site 26, Nakai-Nam Theun National Protected Area	17.7453	105.301	point	permission to release	pc	Coudrat, C. (2013) personal communication	pers_comm	746	Coudrat, C. & Nekaris, K.A.-I. 2013 Modelling Niche Differentiation of Co-Existing, Elusive and Morphologically Similar Species: A Case Study of Four Macaque Species in Nakai-Nam Theun National Protected Area, Laos. Animals 3, 45-62. (doi:10.3390/ani3010045).	peer_rev_pub
186	11	2009	11	2009	1	Lao PDR	Site 27, Nakai-Nam Theun National Protected Area	17.7596	105.302	point	permission to release	pc	Coudrat, C. (2013) personal communication	pers_comm	746	Coudrat, C. & Nekaris, K.A.-I. 2013 Modelling Niche Differentiation of Co-Existing, Elusive and Morphologically Similar Species: A Case Study of Four Macaque Species in Nakai-Nam Theun National Protected Area, Laos. Animals 3, 45-62. (doi:10.3390/ani3010045).	peer_rev_pub
187	12	2008	12	2008	1	Lao PDR	Site 28, Nakai-Nam Theun National Protected Area	17.7882	105.457	point	permission to release	pc	Coudrat, C. (2013) personal communication	pers_comm	746	Coudrat, C. & Nekaris, K.A.-I. 2013 Modelling Niche Differentiation of Co-Existing, Elusive and Morphologically Similar Species: A Case Study of Four Macaque Species in Nakai-Nam Theun National Protected Area, Laos. Animals 3, 45-62. (doi:10.3390/ani3010045).	peer_rev_pub
188	12	2009	12	2009	1	Lao PDR	Site 29, Nakai-Nam Theun National Protected Area	17.7187	105.423	point	permission to release	pc	Coudrat, C. (2013) personal communication	pers_comm	746	Coudrat, C. & Nekaris, K.A.-I. 2013 Modelling Niche Differentiation of Co-Existing, Elusive and Morphologically Similar Species: A Case Study of Four Macaque Species in Nakai-Nam Theun National Protected Area, Laos. Animals 3, 45-62. (doi:10.3390/ani3010045).	peer_rev_pub
189	12	2008	12	2008	1	Lao PDR	Site 30, Nakai-Nam Theun National Protected Area	18.0796	105.439	point	permission to release	pc	Coudrat, C. (2013) personal communication	pers_comm	746	Coudrat, C. & Nekaris, K.A.-I. 2013 Modelling Niche Differentiation of Co-Existing, Elusive and Morphologically Similar Species: A Case Study of Four Macaque Species in Nakai-Nam Theun National Protected Area, Laos. Animals 3, 45-62. (doi:10.3390/ani3010045).	peer_rev_pub
190	1	2011	1	2011	1	Lao PDR	Site 31, Nakai-Nam Theun National Protected Area	17.8867	105.277	point	permission to release	pc	Coudrat, C. (2013) personal communication	pers_comm	746	Coudrat, C. & Nekaris, K.A.-I. 2013 Modelling Niche Differentiation of Co-Existing, Elusive and Morphologically Similar Species: A Case Study of Four Macaque Species in Nakai-Nam Theun National Protected Area, Laos. Animals 3, 45-62. (doi:10.3390/ani3010045).	peer_rev_pub
191	1	2011	1	2011	1	Lao PDR	Site 32, Nakai-Nam Theun National Protected Area	17.897	105.286	point	permission to release	pc	Coudrat, C. (2013) personal communication	pers_comm	746	Coudrat, C. & Nekaris, K.A.-I. 2013 Modelling Niche Differentiation of Co-Existing, Elusive and Morphologically Similar Species: A Case Study of Four Macaque Species in Nakai-Nam Theun National Protected Area, Laos. Animals 3, 45-62. (doi:10.3390/ani3010045).	peer_rev_pub
192	1	2011	1	2011	1	Lao PDR	Site 33, Nakai-Nam Theun National Protected Area	17.8953	105.29	point	permission to release	pc	Coudrat, C. (2013) personal communication	pers_comm	746	Coudrat, C. & Nekaris, K.A.-I. 2013 Modelling Niche Differentiation of Co-Existing, Elusive and Morphologically Similar Species: A Case Study of Four Macaque Species in Nakai-Nam Theun National Protected Area, Laos. Animals 3, 45-62. (doi:10.3390/ani3010045).	peer_rev_pub
193	12	2008	12	2008	1	Lao PDR	Site 34, Nakai-Nam Theun National Protected Area	17.8092	105.437	point	permission to release	pc	Coudrat, C. (2013) personal communication	pers_comm	746	Coudrat, C. & Nekaris, K.A.-I. 2013 Modelling Niche Differentiation of Co-Existing, Elusive and Morphologically Similar Species: A Case Study of Four Macaque Species in Nakai-Nam Theun National Protected Area, Laos. Animals 3, 45-62. (doi:10.3390/ani3010045).	peer_rev_pub
156	5	2009	5	2009	1	Cambodia	Site 1, Samkos Wildlife Sanctuary	12.2024	103.062	point	permission to release	pc	Coudrat, C. (2013) personal communication	pers_comm	20	Coudrat, C.N.Z., Rogers, L.D. & Nekaris, K.A.I. 2011 Abundance of primates reveals Samkos Wildlife Sanctuary, Cardamom Mountains, Cambodia as a priority area for conservation. Oryx 45, 427-434. (doi:10.1017/s0030605310001080).	peer_rev_pub
157	5	2009	5	2009	1	Cambodia	Site 3, Samkos Wildlife Sanctuary	12.2004	103.065	point	permission to release	pc	Coudrat, C. (2013) personal communication	pers_comm	20	Coudrat, C.N.Z., Rogers, L.D. & Nekaris, K.A.I. 2011 Abundance of primates reveals Samkos Wildlife Sanctuary, Cardamom Mountains, Cambodia as a priority area for conservation. Oryx 45, 427-434. (doi:10.1017/s0030605310001080).	peer_rev_pub
158	5	2009	5	2009	1	Cambodia	Site 5, Samkos Wildlife Sanctuary	12.2073	103.066	point	permission to release	pc	Coudrat, C. (2013) personal communication	pers_comm	20	Coudrat, C.N.Z., Rogers, L.D. & Nekaris, K.A.I. 2011 Abundance of primates reveals Samkos Wildlife Sanctuary, Cardamom Mountains, Cambodia as a priority area for conservation. Oryx 45, 427-434. (doi:10.1017/s0030605310001080).	peer_rev_pub
159	5	2009	5	2009	1	Cambodia	Site 6, Samkos Wildlife Sanctuary	12.2017	103.066	point	permission to release	pc	Coudrat, C. (2013) personal communication	pers_comm	20	Coudrat, C.N.Z., Rogers, L.D. & Nekaris, K.A.I. 2011 Abundance of primates reveals Samkos Wildlife Sanctuary, Cardamom Mountains, Cambodia as a priority area for conservation. Oryx 45, 427-434. (doi:10.1017/s0030605310001080).	peer_rev_pub
442	1	2004	2	2004	1	Thailand	KhaoYai_CAMERA_2	14.4428	101.468	point	permission to release	pc	Jenks, K., Smithsonian Conservation Biology Institute (2014) personal communication	pers_comm	752	Jenks, K.E., Howard, J. & Leimgruber, P. 2012 Do ranger stations deter poaching activity in national parks in Thailand? Biotropica 44, 826-833.	peer_rev_pub
443	1	2004	2	2004	1	Thailand	KhaoYai_CAMERA_3	14.398	101.505	point	permission to release	pc	Jenks, K., Smithsonian Conservation Biology Institute (2014) personal communication	pers_comm	752	Jenks, K.E., Howard, J. & Leimgruber, P. 2012 Do ranger stations deter poaching activity in national parks in Thailand? Biotropica 44, 826-833.	peer_rev_pub
444	4	2004	4	2004	1	Thailand	KhaoYai_CAMERA_8	14.4987	101.182	point	permission to release	pc	Jenks, K., Smithsonian Conservation Biology Institute (2014) personal communication	pers_comm	752	Jenks, K.E., Howard, J. & Leimgruber, P. 2012 Do ranger stations deter poaching activity in national parks in Thailand? Biotropica 44, 826-833.	peer_rev_pub
445	4	2004	4	2004	1	Thailand	KhaoYai_CAMERA_9	14.4877	101.183	point	permission to release	pc	Jenks, K., Smithsonian Conservation Biology Institute (2014) personal communication	pers_comm	752	Jenks, K.E., Howard, J. & Leimgruber, P. 2012 Do ranger stations deter poaching activity in national parks in Thailand? Biotropica 44, 826-833.	peer_rev_pub
446	4	2004	4	2004	1	Thailand	KhaoYai_CAMERA_12	14.4818	101.179	point	permission to release	pc	Jenks, K., Smithsonian Conservation Biology Institute (2014) personal communication	pers_comm	752	Jenks, K.E., Howard, J. & Leimgruber, P. 2012 Do ranger stations deter poaching activity in national parks in Thailand? Biotropica 44, 826-833.	peer_rev_pub
447	4	2004	4	2004	1	Thailand	KhaoYai_CAMERA_7	14.4529	101.357	point	permission to release	pc	Jenks, K., Smithsonian Conservation Biology Institute (2014) personal communication	pers_comm	752	Jenks, K.E., Howard, J. & Leimgruber, P. 2012 Do ranger stations deter poaching activity in national parks in Thailand? Biotropica 44, 826-833.	peer_rev_pub
448	6	2004	8	2004	1	Thailand	KhaoYai_CAMERA_1	14.1912	101.635	point	permission to release	pc	Jenks, K., Smithsonian Conservation Biology Institute (2014) personal communication	pers_comm	752	Jenks, K.E., Howard, J. & Leimgruber, P. 2012 Do ranger stations deter poaching activity in national parks in Thailand? Biotropica 44, 826-833.	peer_rev_pub
449	6	2004	8	2004	1	Thailand	KhaoYai_CAMERA_6	14.201	101.646	point	permission to release	pc	Jenks, K., Smithsonian Conservation Biology Institute (2014) personal communication	pers_comm	752	Jenks, K.E., Howard, J. & Leimgruber, P. 2012 Do ranger stations deter poaching activity in national parks in Thailand? Biotropica 44, 826-833.	peer_rev_pub
450	6	2004	8	2004	1	Thailand	KhaoYai_CAMERA_4	14.2017	101.655	point	permission to release	pc	Jenks, K., Smithsonian Conservation Biology Institute (2014) personal communication	pers_comm	752	Jenks, K.E., Howard, J. & Leimgruber, P. 2012 Do ranger stations deter poaching activity in national parks in Thailand? Biotropica 44, 826-833.	peer_rev_pub
451	10	2004	12	2004	1	Thailand	KhaoYai_CAMERA_23	14.4714	101.499	point	permission to release	pc	Jenks, K., Smithsonian Conservation Biology Institute (2014) personal communication	pers_comm	752	Jenks, K.E., Howard, J. & Leimgruber, P. 2012 Do ranger stations deter poaching activity in national parks in Thailand? Biotropica 44, 826-833.	peer_rev_pub
452	12	2004	1	2005	1	Thailand	KhaoYai_CAMERA_13	14.4177	101.174	point	permission to release	pc	Jenks, K., Smithsonian Conservation Biology Institute (2014) personal communication	pers_comm	752	Jenks, K.E., Howard, J. & Leimgruber, P. 2012 Do ranger stations deter poaching activity in national parks in Thailand? Biotropica 44, 826-833.	peer_rev_pub
453	12	2004	1	2005	1	Thailand	KhaoYai_CAMERA_1	14.4915	101.178	point	permission to release	pc	Jenks, K., Smithsonian Conservation Biology Institute (2014) personal communication	pers_comm	752	Jenks, K.E., Howard, J. & Leimgruber, P. 2012 Do ranger stations deter poaching activity in national parks in Thailand? Biotropica 44, 826-833.	peer_rev_pub
454	12	2004	1	2005	1	Thailand	KhaoYai_CAMERA_10	14.3768	101.203	point	permission to release	pc	Jenks, K., Smithsonian Conservation Biology Institute (2014) personal communication	pers_comm	752	Jenks, K.E., Howard, J. & Leimgruber, P. 2012 Do ranger stations deter poaching activity in national parks in Thailand? Biotropica 44, 826-833.	peer_rev_pub
455	12	2004	1	2005	1	Thailand	KhaoYai_CAMERA_3	14.4875	101.184	point	permission to release	pc	Jenks, K., Smithsonian Conservation Biology Institute (2014) personal communication	pers_comm	752	Jenks, K.E., Howard, J. & Leimgruber, P. 2012 Do ranger stations deter poaching activity in national parks in Thailand? Biotropica 44, 826-833.	peer_rev_pub
456	1	2005	2	2005	1	Thailand	KhaoYai_CAMERA_3	14.2896	101.406	point	permission to release	pc	Jenks, K., Smithsonian Conservation Biology Institute (2014) personal communication	pers_comm	752	Jenks, K.E., Howard, J. & Leimgruber, P. 2012 Do ranger stations deter poaching activity in national parks in Thailand? Biotropica 44, 826-833.	peer_rev_pub
457	1	2005	2	2005	1	Thailand	KhaoYai_CAMERA_27	14.3087	101.395	point	permission to release	pc	Jenks, K., Smithsonian Conservation Biology Institute (2014) personal communication	pers_comm	752	Jenks, K.E., Howard, J. & Leimgruber, P. 2012 Do ranger stations deter poaching activity in national parks in Thailand? Biotropica 44, 826-833.	peer_rev_pub
458	1	2005	2	2005	1	Thailand	KhaoYai_CAMERA_12	14.325	101.369	point	permission to release	pc	Jenks, K., Smithsonian Conservation Biology Institute (2014) personal communication	pers_comm	752	Jenks, K.E., Howard, J. & Leimgruber, P. 2012 Do ranger stations deter poaching activity in national parks in Thailand? Biotropica 44, 826-833.	peer_rev_pub
459	3	2005	4	2005	1	Thailand	KhaoYai_CAMERA_25	14.202	101.65	point	permission to release	pc	Jenks, K., Smithsonian Conservation Biology Institute (2014) personal communication	pers_comm	752	Jenks, K.E., Howard, J. & Leimgruber, P. 2012 Do ranger stations deter poaching activity in national parks in Thailand? Biotropica 44, 826-833.	peer_rev_pub
460	5	2005	5	2005	1	Thailand	KhaoYai_CAMERA_10	14.5456	101.185	point	permission to release	pc	Jenks, K., Smithsonian Conservation Biology Institute (2014) personal communication	pers_comm	752	Jenks, K.E., Howard, J. & Leimgruber, P. 2012 Do ranger stations deter poaching activity in national parks in Thailand? Biotropica 44, 826-833.	peer_rev_pub
461	7	2005	7	2005	1	Thailand	KhaoYai_CAMERA_15	14.4172	101.464	point	permission to release	pc	Jenks, K., Smithsonian Conservation Biology Institute (2014) personal communication	pers_comm	752	Jenks, K.E., Howard, J. & Leimgruber, P. 2012 Do ranger stations deter poaching activity in national parks in Thailand? Biotropica 44, 826-833.	peer_rev_pub
462	6	2005	7	2005	1	Thailand	KhaoYai_CAMERA_6	14.3391	101.484	point	permission to release	pc	Jenks, K., Smithsonian Conservation Biology Institute (2014) personal communication	pers_comm	752	Jenks, K.E., Howard, J. & Leimgruber, P. 2012 Do ranger stations deter poaching activity in national parks in Thailand? Biotropica 44, 826-833.	peer_rev_pub
463	6	2005	7	2005	1	Thailand	KhaoYai_CAMERA_11	14.3896	101.496	point	permission to release	pc	Jenks, K., Smithsonian Conservation Biology Institute (2014) personal communication	pers_comm	752	Jenks, K.E., Howard, J. & Leimgruber, P. 2012 Do ranger stations deter poaching activity in national parks in Thailand? Biotropica 44, 826-833.	peer_rev_pub
464	9	2005	10	2005	1	Thailand	KhaoYai_CAMERA_10	14.346	101.305	point	permission to release	pc	Jenks, K., Smithsonian Conservation Biology Institute (2014) personal communication	pers_comm	752	Jenks, K.E., Howard, J. & Leimgruber, P. 2012 Do ranger stations deter poaching activity in national parks in Thailand? Biotropica 44, 826-833.	peer_rev_pub
465	9	2005	10	2005	1	Thailand	KhaoYai_CAMERA_11	14.4912	101.178	point	permission to release	pc	Jenks, K., Smithsonian Conservation Biology Institute (2014) personal communication	pers_comm	752	Jenks, K.E., Howard, J. & Leimgruber, P. 2012 Do ranger stations deter poaching activity in national parks in Thailand? Biotropica 44, 826-833.	peer_rev_pub
466	9	2005	10	2005	1	Thailand	KhaoYai_CAMERA_12	14.4886	101.182	point	permission to release	pc	Jenks, K., Smithsonian Conservation Biology Institute (2014) personal communication	pers_comm	752	Jenks, K.E., Howard, J. & Leimgruber, P. 2012 Do ranger stations deter poaching activity in national parks in Thailand? Biotropica 44, 826-833.	peer_rev_pub
467	9	2005	10	2005	1	Thailand	KhaoYai_CAMERA_15	14.4824	101.177	point	permission to release	pc	Jenks, K., Smithsonian Conservation Biology Institute (2014) personal communication	pers_comm	752	Jenks, K.E., Howard, J. & Leimgruber, P. 2012 Do ranger stations deter poaching activity in national parks in Thailand? Biotropica 44, 826-833.	peer_rev_pub
468	10	2005	10	2005	1	Thailand	KhaoYai_CAMERA_5	14.504	101.296	point	permission to release	pc	Jenks, K., Smithsonian Conservation Biology Institute (2014) personal communication	pers_comm	752	Jenks, K.E., Howard, J. & Leimgruber, P. 2012 Do ranger stations deter poaching activity in national parks in Thailand? Biotropica 44, 826-833.	peer_rev_pub
469	6	2008	7	2008	1	Thailand	KARN_CAMERA_M5	13.4027	101.888	point	permission to release	pc	Jenks, K., Smithsonian Conservation Biology Institute (2014) personal communication	pers_comm
470	7	2008	7	2008	1	Thailand	KARN_CAMERA_M3	13.4081	101.9	point	permission to release	pc	Jenks, K., Smithsonian Conservation Biology Institute (2014) personal communication	pers_comm
471	7	2008	8	2008	1	Thailand	KARN_CAMERA_UMass02	13.3997	101.882	point	permission to release	pc	Jenks, K., Smithsonian Conservation Biology Institute (2014) personal communication	pers_comm
472	6	2009	8	2009	1	Thailand	KARN_CAMERA_M11	13.3626	101.793	point	permission to release	pc	Jenks, K., Smithsonian Conservation Biology Institute (2014) personal communication	pers_comm
473	6	2009	9	2009	1	Thailand	KARN_CAMERA_M9	13.412	101.877	point	permission to release	pc	Jenks, K., Smithsonian Conservation Biology Institute (2014) personal communication	pers_comm
474	6	2009	8	2009	1	Thailand	KARN_CAMERA_M11	13.3626	101.793	point	permission to release	pc	Jenks, K., Smithsonian Conservation Biology Institute (2014) personal communication	pers_comm
475	10	2009	10	2009	1	Thailand	KARN_CAMERA_M14	13.4096	101.898	point	permission to release	pc	Jenks, K., Smithsonian Conservation Biology Institute (2014) personal communication	pers_comm
476	10	2009	10	2009	1	Thailand	KARN_CAMERA_M16	13.4012	101.9	point	permission to release	pc	Jenks, K., Smithsonian Conservation Biology Institute (2014) personal communication	pers_comm
477	10	2009	12	2009	1	Thailand	KARN_CAMERA_M16	13.4012	101.9	point	permission to release	pc	Jenks, K., Smithsonian Conservation Biology Institute (2014) personal communication	pers_comm
478	10	2009	12	2009	1	Thailand	KARN_CAMERA_M12	13.4085	101.896	point	permission to release	pc	Jenks, K., Smithsonian Conservation Biology Institute (2014) personal communication	pers_comm
479	10	2009	12	2009	1	Thailand	KARN_CAMERA_M12	13.4085	101.896	point	permission to release	pc	Jenks, K., Smithsonian Conservation Biology Institute (2014) personal communication	pers_comm
480	10	2009	12	2009	1	Thailand	KARN_CAMERA_M16	13.4012	101.9	point	permission to release	pc	Jenks, K., Smithsonian Conservation Biology Institute (2014) personal communication	pers_comm
481	10	2009	12	2009	1	Thailand	KARN_CAMERA_M9B	13.2737	101.755	point	permission to release	pc	Jenks, K., Smithsonian Conservation Biology Institute (2014) personal communication	pers_comm
482	12	2009	3	2010	1	Thailand	KARN_CAMERA_M5B	13.3995	101.88	point	permission to release	pc	Jenks, K., Smithsonian Conservation Biology Institute (2014) personal communication	pers_comm
483	12	2009	12	2009	1	Thailand	KARN_CAMERA_M9	13.3902	101.907	point	permission to release	pc	Jenks, K., Smithsonian Conservation Biology Institute (2014) personal communication	pers_comm
484	12	2009	2	2010	1	Thailand	KARN_CAMERA_M9B	13.2737	101.755	point	permission to release	pc	Jenks, K., Smithsonian Conservation Biology Institute (2014) personal communication	pers_comm
485	12	2009	2	2010	1	Thailand	KARN_CAMERA_M9	13.3902	101.907	point	permission to release	pc	Jenks, K., Smithsonian Conservation Biology Institute (2014) personal communication	pers_comm
486	12	2009	2	2010	1	Thailand	KARN_CAMERA_M9B	13.2737	101.755	point	permission to release	pc	Jenks, K., Smithsonian Conservation Biology Institute (2014) personal communication	pers_comm
487	3	2010	4	2010	1	Thailand	KARN_CAMERA_M16	13.4012	101.9	point	permission to release	pc	Jenks, K., Smithsonian Conservation Biology Institute (2014) personal communication	pers_comm
488	4	2010	4	2010	1	Thailand	KARN_CAMERA_M16	13.404	101.897	point	permission to release	pc	Jenks, K., Smithsonian Conservation Biology Institute (2014) personal communication	pers_comm
489	4	2010	5	2010	1	Thailand	KARN_CAMERA_M12	13.412	101.893	point	permission to release	pc	Jenks, K., Smithsonian Conservation Biology Institute (2014) personal communication	pers_comm
490	5	2010	6	2010	1	Thailand	KARN_CAMERA_M12	13.412	101.893	point	permission to release	pc	Jenks, K., Smithsonian Conservation Biology Institute (2014) personal communication	pers_comm
491	5	2010	7	2010	1	Thailand	KARN_CAMERA_M20	13.2193	101.739	point	permission to release	pc	Jenks, K., Smithsonian Conservation Biology Institute (2014) personal communication	pers_comm
492	5	2010	5	2010	1	Thailand	KARN_CAMERA_M16	13.404	101.897	point	permission to release	pc	Jenks, K., Smithsonian Conservation Biology Institute (2014) personal communication	pers_comm
493	5	2010	7	2010	1	Thailand	KARN_CAMERA_M19	13.2361	101.751	point	permission to release	pc	Jenks, K., Smithsonian Conservation Biology Institute (2014) personal communication	pers_comm
494	6	2010	7	2010	1	Thailand	KARN_CAMERA_M12	13.412	101.893	point	permission to release	pc	Jenks, K., Smithsonian Conservation Biology Institute (2014) personal communication	pers_comm
495	6	2010	7	2010	1	Thailand	KARN_CAMERA_M12	13.412	101.893	point	permission to release	pc	Jenks, K., Smithsonian Conservation Biology Institute (2014) personal communication	pers_comm
496	6	2010	7	2010	1	Thailand	KARN_CAMERA_M12	13.412	101.893	point	permission to release	pc	Jenks, K., Smithsonian Conservation Biology Institute (2014) personal communication	pers_comm
497	6	2010	7	2010	1	Thailand	KARN_CAMERA_M12	13.412	101.893	point	permission to release	pc	Jenks, K., Smithsonian Conservation Biology Institute (2014) personal communication	pers_comm
498	5	2010	7	2010	1	Thailand	KARN_CAMERA_M5B	13.4024	101.877	point	permission to release	pc	Jenks, K., Smithsonian Conservation Biology Institute (2014) personal communication	pers_comm
499	9	2010	10	2010	1	Thailand	KARN_CAMERA_M6	13.393	101.904	point	permission to release	pc	Jenks, K., Smithsonian Conservation Biology Institute (2014) personal communication	pers_comm
500	11	2010	12	2010	1	Thailand	KARN_CAMERA_M12	13.412	101.893	point	permission to release	pc	Jenks, K., Smithsonian Conservation Biology Institute (2014) personal communication	pers_comm
501	11	2010	12	2010	1	Thailand	KARN_CAMERA_M7	13.4114	101.886	point	permission to release	pc	Jenks, K., Smithsonian Conservation Biology Institute (2014) personal communication	pers_comm
502	11	2010	12	2010	1	Thailand	KARN_CAMERA_M7	13.4114	101.886	point	permission to release	pc	Jenks, K., Smithsonian Conservation Biology Institute (2014) personal communication	pers_comm
503	11	2010	12	2010	1	Thailand	KARN_CAMERA_M7	13.4114	101.886	point	permission to release	pc	Jenks, K., Smithsonian Conservation Biology Institute (2014) personal communication	pers_comm
504	11	2010	12	2010	1	Thailand	KARN_CAMERA_M12	13.412	101.893	point	permission to release	pc	Jenks, K., Smithsonian Conservation Biology Institute (2014) personal communication	pers_comm
505	11	2010	12	2010	1	Thailand	KARN_CAMERA_M7	13.4114	101.886	point	permission to release	pc	Jenks, K., Smithsonian Conservation Biology Institute (2014) personal communication	pers_comm
99	7	2005	9	2008	1	Lao PDR	Site 1, Central & Southern Laos	17.9	101.6	point	published	493	Hamada, Y., Kurita, H., Goto, S., Morimitsu, Y., Malaivijitnond, S., Pathonton, F., Pathontone, B., Kingsada, P., Vongsombath, C., Samouth, F., et al. 2010 Distribution and Present Status of Macaques in Lao PDR. In Conservation Primates in Indochina (eds. T. Nadler, B.M. Rawson & V.N. Thinh), p. 288. Hanoi, Frankfurt Zoological Society and Conservation International.	book_chapter
100	7	2005	9	2008	1	Lao PDR	Site 2, Central & Southern Laos	17.9	101.65	point	published	493	Hamada, Y., Kurita, H., Goto, S., Morimitsu, Y., Malaivijitnond, S., Pathonton, F., Pathontone, B., Kingsada, P., Vongsombath, C., Samouth, F., et al. 2010 Distribution and Present Status of Macaques in Lao PDR. In Conservation Primates in Indochina (eds. T. Nadler, B.M. Rawson & V.N. Thinh), p. 288. Hanoi, Frankfurt Zoological Society and Conservation International.	book_chapter
101	7	2005	9	2008	1	Lao PDR	Site 3, Central & Southern Laos	18.35	101.9	point	published	493	Hamada, Y., Kurita, H., Goto, S., Morimitsu, Y., Malaivijitnond, S., Pathonton, F., Pathontone, B., Kingsada, P., Vongsombath, C., Samouth, F., et al. 2010 Distribution and Present Status of Macaques in Lao PDR. In Conservation Primates in Indochina (eds. T. Nadler, B.M. Rawson & V.N. Thinh), p. 288. Hanoi, Frankfurt Zoological Society and Conservation International.	book_chapter
102	7	2005	9	2008	1	Lao PDR	Site 4, Central & Southern Laos	18.55	101.95	point	published	493	Hamada, Y., Kurita, H., Goto, S., Morimitsu, Y., Malaivijitnond, S., Pathonton, F., Pathontone, B., Kingsada, P., Vongsombath, C., Samouth, F., et al. 2010 Distribution and Present Status of Macaques in Lao PDR. In Conservation Primates in Indochina (eds. T. Nadler, B.M. Rawson & V.N. Thinh), p. 288. Hanoi, Frankfurt Zoological Society and Conservation International.	book_chapter
103	7	2005	9	2008	1	Lao PDR	Site 5, Central & Southern Laos	18.65	102.1	point	published	493	Hamada, Y., Kurita, H., Goto, S., Morimitsu, Y., Malaivijitnond, S., Pathonton, F., Pathontone, B., Kingsada, P., Vongsombath, C., Samouth, F., et al. 2010 Distribution and Present Status of Macaques in Lao PDR. In Conservation Primates in Indochina (eds. T. Nadler, B.M. Rawson & V.N. Thinh), p. 288. Hanoi, Frankfurt Zoological Society and Conservation International.	book_chapter
104	7	2005	9	2008	1	Lao PDR	Site 6, Central & Southern Laos	18.15	102.35	point	published	493	Hamada, Y., Kurita, H., Goto, S., Morimitsu, Y., Malaivijitnond, S., Pathonton, F., Pathontone, B., Kingsada, P., Vongsombath, C., Samouth, F., et al. 2010 Distribution and Present Status of Macaques in Lao PDR. In Conservation Primates in Indochina (eds. T. Nadler, B.M. Rawson & V.N. Thinh), p. 288. Hanoi, Frankfurt Zoological Society and Conservation International.	book_chapter
105	7	2005	9	2008	1	Lao PDR	Site 7, Central & Southern Laos	18.65	102.3	point	published	493	Hamada, Y., Kurita, H., Goto, S., Morimitsu, Y., Malaivijitnond, S., Pathonton, F., Pathontone, B., Kingsada, P., Vongsombath, C., Samouth, F., et al. 2010 Distribution and Present Status of Macaques in Lao PDR. In Conservation Primates in Indochina (eds. T. Nadler, B.M. Rawson & V.N. Thinh), p. 288. Hanoi, Frankfurt Zoological Society and Conservation International.	book_chapter
106	7	2005	9	2008	1	Lao PDR	Site 8, Central & Southern Laos	18.9	102.45	point	published	493	Hamada, Y., Kurita, H., Goto, S., Morimitsu, Y., Malaivijitnond, S., Pathonton, F., Pathontone, B., Kingsada, P., Vongsombath, C., Samouth, F., et al. 2010 Distribution and Present Status of Macaques in Lao PDR. In Conservation Primates in Indochina (eds. T. Nadler, B.M. Rawson & V.N. Thinh), p. 288. Hanoi, Frankfurt Zoological Society and Conservation International.	book_chapter
107	7	2005	9	2008	1	Lao PDR	Site 10, Central & Southern Laos	19	102.45	point	published	493	Hamada, Y., Kurita, H., Goto, S., Morimitsu, Y., Malaivijitnond, S., Pathonton, F., Pathontone, B., Kingsada, P., Vongsombath, C., Samouth, F., et al. 2010 Distribution and Present Status of Macaques in Lao PDR. In Conservation Primates in Indochina (eds. T. Nadler, B.M. Rawson & V.N. Thinh), p. 288. Hanoi, Frankfurt Zoological Society and Conservation International.	book_chapter
108	7	2005	9	2008	1	Lao PDR	Site 11, Central & Southern Laos	19.1	102.4	point	published	493	Hamada, Y., Kurita, H., Goto, S., Morimitsu, Y., Malaivijitnond, S., Pathonton, F., Pathontone, B., Kingsada, P., Vongsombath, C., Samouth, F., et al. 2010 Distribution and Present Status of Macaques in Lao PDR. In Conservation Primates in Indochina (eds. T. Nadler, B.M. Rawson & V.N. Thinh), p. 288. Hanoi, Frankfurt Zoological Society and Conservation International.	book_chapter
109	7	2005	9	2008	1	Lao PDR	Site 12, Central & Southern Laos	19.2	102.25	point	published	493	Hamada, Y., Kurita, H., Goto, S., Morimitsu, Y., Malaivijitnond, S., Pathonton, F., Pathontone, B., Kingsada, P., Vongsombath, C., Samouth, F., et al. 2010 Distribution and Present Status of Macaques in Lao PDR. In Conservation Primates in Indochina (eds. T. Nadler, B.M. Rawson & V.N. Thinh), p. 288. Hanoi, Frankfurt Zoological Society and Conservation International.	book_chapter
110	7	2005	9	2008	1	Lao PDR	Site 13, Central & Southern Laos	15.8	105.5	point	published	493	Hamada, Y., Kurita, H., Goto, S., Morimitsu, Y., Malaivijitnond, S., Pathonton, F., Pathontone, B., Kingsada, P., Vongsombath, C., Samouth, F., et al. 2010 Distribution and Present Status of Macaques in Lao PDR. In Conservation Primates in Indochina (eds. T. Nadler, B.M. Rawson & V.N. Thinh), p. 288. Hanoi, Frankfurt Zoological Society and Conservation International.	book_chapter
111	7	2005	9	2008	1	Lao PDR	Site 14, Central & Southern Laos	15.1	105.6	point	published	493	Hamada, Y., Kurita, H., Goto, S., Morimitsu, Y., Malaivijitnond, S., Pathonton, F., Pathontone, B., Kingsada, P., Vongsombath, C., Samouth, F., et al. 2010 Distribution and Present Status of Macaques in Lao PDR. In Conservation Primates in Indochina (eds. T. Nadler, B.M. Rawson & V.N. Thinh), p. 288. Hanoi, Frankfurt Zoological Society and Conservation International.	book_chapter
112	7	2005	9	2008	1	Lao PDR	Site 15, Central & Southern Laos	16.6	105.75	point	published	493	Hamada, Y., Kurita, H., Goto, S., Morimitsu, Y., Malaivijitnond, S., Pathonton, F., Pathontone, B., Kingsada, P., Vongsombath, C., Samouth, F., et al. 2010 Distribution and Present Status of Macaques in Lao PDR. In Conservation Primates in Indochina (eds. T. Nadler, B.M. Rawson & V.N. Thinh), p. 288. Hanoi, Frankfurt Zoological Society and Conservation International.	book_chapter
113	7	2005	9	2008	1	Lao PDR	Site 16, Central & Southern Laos	15.7	105.8	point	published	493	Hamada, Y., Kurita, H., Goto, S., Morimitsu, Y., Malaivijitnond, S., Pathonton, F., Pathontone, B., Kingsada, P., Vongsombath, C., Samouth, F., et al. 2010 Distribution and Present Status of Macaques in Lao PDR. In Conservation Primates in Indochina (eds. T. Nadler, B.M. Rawson & V.N. Thinh), p. 288. Hanoi, Frankfurt Zoological Society and Conservation International.	book_chapter
114	7	2005	9	2008	1	Lao PDR	Site 17, Central & Southern Laos	14.5	105.8	point	published	493	Hamada, Y., Kurita, H., Goto, S., Morimitsu, Y., Malaivijitnond, S., Pathonton, F., Pathontone, B., Kingsada, P., Vongsombath, C., Samouth, F., et al. 2010 Distribution and Present Status of Macaques in Lao PDR. In Conservation Primates in Indochina (eds. T. Nadler, B.M. Rawson & V.N. Thinh), p. 288. Hanoi, Frankfurt Zoological Society and Conservation International.	book_chapter
115	7	2005	9	2008	1	Lao PDR	Site 18, Central & Southern Laos	14.25	105.9	point	published	493	Hamada, Y., Kurita, H., Goto, S., Morimitsu, Y., Malaivijitnond, S., Pathonton, F., Pathontone, B., Kingsada, P., Vongsombath, C., Samouth, F., et al. 2010 Distribution and Present Status of Macaques in Lao PDR. In Conservation Primates in Indochina (eds. T. Nadler, B.M. Rawson & V.N. Thinh), p. 288. Hanoi, Frankfurt Zoological Society and Conservation International.	book_chapter
116	7	2005	9	2008	1	Lao PDR	Site 19, Central & Southern Laos	14.1	105.9	point	published	493	Hamada, Y., Kurita, H., Goto, S., Morimitsu, Y., Malaivijitnond, S., Pathonton, F., Pathontone, B., Kingsada, P., Vongsombath, C., Samouth, F., et al. 2010 Distribution and Present Status of Macaques in Lao PDR. In Conservation Primates in Indochina (eds. T. Nadler, B.M. Rawson & V.N. Thinh), p. 288. Hanoi, Frankfurt Zoological Society and Conservation International.	book_chapter
117	7	2005	9	2008	1	Lao PDR	Site 20, Central & Southern Laos	14.9	105.9	point	published	493	Hamada, Y., Kurita, H., Goto, S., Morimitsu, Y., Malaivijitnond, S., Pathonton, F., Pathontone, B., Kingsada, P., Vongsombath, C., Samouth, F., et al. 2010 Distribution and Present Status of Macaques in Lao PDR. In Conservation Primates in Indochina (eds. T. Nadler, B.M. Rawson & V.N. Thinh), p. 288. Hanoi, Frankfurt Zoological Society and Conservation International.	book_chapter
118	7	2005	9	2008	1	Lao PDR	Site 21, Central & Southern Laos	14.75	106	point	published	493	Hamada, Y., Kurita, H., Goto, S., Morimitsu, Y., Malaivijitnond, S., Pathonton, F., Pathontone, B., Kingsada, P., Vongsombath, C., Samouth, F., et al. 2010 Distribution and Present Status of Macaques in Lao PDR. In Conservation Primates in Indochina (eds. T. Nadler, B.M. Rawson & V.N. Thinh), p. 288. Hanoi, Frankfurt Zoological Society and Conservation International.	book_chapter
119	7	2005	9	2008	1	Lao PDR	Site 22, Central & Southern Laos	15.75	106	point	published	493	Hamada, Y., Kurita, H., Goto, S., Morimitsu, Y., Malaivijitnond, S., Pathonton, F., Pathontone, B., Kingsada, P., Vongsombath, C., Samouth, F., et al. 2010 Distribution and Present Status of Macaques in Lao PDR. In Conservation Primates in Indochina (eds. T. Nadler, B.M. Rawson & V.N. Thinh), p. 288. Hanoi, Frankfurt Zoological Society and Conservation International.	book_chapter
120	7	2005	9	2008	1	Lao PDR	Site 23, Central & Southern Laos	16.2	106.1	point	published	493	Hamada, Y., Kurita, H., Goto, S., Morimitsu, Y., Malaivijitnond, S., Pathonton, F., Pathontone, B., Kingsada, P., Vongsombath, C., Samouth, F., et al. 2010 Distribution and Present Status of Macaques in Lao PDR. In Conservation Primates in Indochina (eds. T. Nadler, B.M. Rawson & V.N. Thinh), p. 288. Hanoi, Frankfurt Zoological Society and Conservation International.	book_chapter
121	7	2005	9	2008	1	Lao PDR	Site 24, Central & Southern Laos	16.7	106.25	point	published	493	Hamada, Y., Kurita, H., Goto, S., Morimitsu, Y., Malaivijitnond, S., Pathonton, F., Pathontone, B., Kingsada, P., Vongsombath, C., Samouth, F., et al. 2010 Distribution and Present Status of Macaques in Lao PDR. In Conservation Primates in Indochina (eds. T. Nadler, B.M. Rawson & V.N. Thinh), p. 288. Hanoi, Frankfurt Zoological Society and Conservation International.	book_chapter
122	7	2005	9	2008	1	Lao PDR	Site 25, Central & Southern Laos	15.5	106.5	point	published	493	Hamada, Y., Kurita, H., Goto, S., Morimitsu, Y., Malaivijitnond, S., Pathonton, F., Pathontone, B., Kingsada, P., Vongsombath, C., Samouth, F., et al. 2010 Distribution and Present Status of Macaques in Lao PDR. In Conservation Primates in Indochina (eds. T. Nadler, B.M. Rawson & V.N. Thinh), p. 288. Hanoi, Frankfurt Zoological Society and Conservation International.	book_chapter
123	7	2005	9	2008	1	Lao PDR	Site 26, Central & Southern Laos	14.6	106.6	point	published	493	Hamada, Y., Kurita, H., Goto, S., Morimitsu, Y., Malaivijitnond, S., Pathonton, F., Pathontone, B., Kingsada, P., Vongsombath, C., Samouth, F., et al. 2010 Distribution and Present Status of Macaques in Lao PDR. In Conservation Primates in Indochina (eds. T. Nadler, B.M. Rawson & V.N. Thinh), p. 288. Hanoi, Frankfurt Zoological Society and Conservation International.	book_chapter
124	7	2005	9	2008	1	Lao PDR	Site 27, Central & Southern Laos	14.6	106.7	point	published	493	Hamada, Y., Kurita, H., Goto, S., Morimitsu, Y., Malaivijitnond, S., Pathonton, F., Pathontone, B., Kingsada, P., Vongsombath, C., Samouth, F., et al. 2010 Distribution and Present Status of Macaques in Lao PDR. In Conservation Primates in Indochina (eds. T. Nadler, B.M. Rawson & V.N. Thinh), p. 288. Hanoi, Frankfurt Zoological Society and Conservation International.	book_chapter
125	7	2005	9	2008	1	Lao PDR	Site 28, Central & Southern Laos	14.75	106.75	point	published	493	Hamada, Y., Kurita, H., Goto, S., Morimitsu, Y., Malaivijitnond, S., Pathonton, F., Pathontone, B., Kingsada, P., Vongsombath, C., Samouth, F., et al. 2010 Distribution and Present Status of Macaques in Lao PDR. In Conservation Primates in Indochina (eds. T. Nadler, B.M. Rawson & V.N. Thinh), p. 288. Hanoi, Frankfurt Zoological Society and Conservation International.	book_chapter
126	7	2005	9	2008	1	Lao PDR	Site 29, Central & Southern Laos	14.8	106.7	point	published	493	Hamada, Y., Kurita, H., Goto, S., Morimitsu, Y., Malaivijitnond, S., Pathonton, F., Pathontone, B., Kingsada, P., Vongsombath, C., Samouth, F., et al. 2010 Distribution and Present Status of Macaques in Lao PDR. In Conservation Primates in Indochina (eds. T. Nadler, B.M. Rawson & V.N. Thinh), p. 288. Hanoi, Frankfurt Zoological Society and Conservation International.	book_chapter
127	7	2005	9	2008	1	Lao PDR	Site 30, Central & Southern Laos	15.2	106.8	point	published	493	Hamada, Y., Kurita, H., Goto, S., Morimitsu, Y., Malaivijitnond, S., Pathonton, F., Pathontone, B., Kingsada, P., Vongsombath, C., Samouth, F., et al. 2010 Distribution and Present Status of Macaques in Lao PDR. In Conservation Primates in Indochina (eds. T. Nadler, B.M. Rawson & V.N. Thinh), p. 288. Hanoi, Frankfurt Zoological Society and Conservation International.	book_chapter
128	7	2005	9	2008	1	Lao PDR	Site 31, Central & Southern Laos	15.3	106.5	point	published	493	Hamada, Y., Kurita, H., Goto, S., Morimitsu, Y., Malaivijitnond, S., Pathonton, F., Pathontone, B., Kingsada, P., Vongsombath, C., Samouth, F., et al. 2010 Distribution and Present Status of Macaques in Lao PDR. In Conservation Primates in Indochina (eds. T. Nadler, B.M. Rawson & V.N. Thinh), p. 288. Hanoi, Frankfurt Zoological Society and Conservation International.	book_chapter
129	7	2005	9	2008	1	Lao PDR	Site 32, Central & Southern Laos	15	106.8	point	published	493	Hamada, Y., Kurita, H., Goto, S., Morimitsu, Y., Malaivijitnond, S., Pathonton, F., Pathontone, B., Kingsada, P., Vongsombath, C., Samouth, F., et al. 2010 Distribution and Present Status of Macaques in Lao PDR. In Conservation Primates in Indochina (eds. T. Nadler, B.M. Rawson & V.N. Thinh), p. 288. Hanoi, Frankfurt Zoological Society and Conservation International.	book_chapter
130	7	2005	9	2008	1	Lao PDR	Site 33, Central & Southern Laos	14.75	107.1	point	published	493	Hamada, Y., Kurita, H., Goto, S., Morimitsu, Y., Malaivijitnond, S., Pathonton, F., Pathontone, B., Kingsada, P., Vongsombath, C., Samouth, F., et al. 2010 Distribution and Present Status of Macaques in Lao PDR. In Conservation Primates in Indochina (eds. T. Nadler, B.M. Rawson & V.N. Thinh), p. 288. Hanoi, Frankfurt Zoological Society and Conservation International.	book_chapter
131	7	2005	9	2008	1	Lao PDR	Site 34, Central & Southern Laos	14.7	107.2	point	published	493	Hamada, Y., Kurita, H., Goto, S., Morimitsu, Y., Malaivijitnond, S., Pathonton, F., Pathontone, B., Kingsada, P., Vongsombath, C., Samouth, F., et al. 2010 Distribution and Present Status of Macaques in Lao PDR. In Conservation Primates in Indochina (eds. T. Nadler, B.M. Rawson & V.N. Thinh), p. 288. Hanoi, Frankfurt Zoological Society and Conservation International.	book_chapter
132	7	2005	9	2008	1	Lao PDR	Site 35, Central & Southern Laos	14.75	107.4	point	published	493	Hamada, Y., Kurita, H., Goto, S., Morimitsu, Y., Malaivijitnond, S., Pathonton, F., Pathontone, B., Kingsada, P., Vongsombath, C., Samouth, F., et al. 2010 Distribution and Present Status of Macaques in Lao PDR. In Conservation Primates in Indochina (eds. T. Nadler, B.M. Rawson & V.N. Thinh), p. 288. Hanoi, Frankfurt Zoological Society and Conservation International.	book_chapter
133	7	2005	9	2008	1	Lao PDR	Site 36, Central & Southern Laos	14.75	107.5	point	published	493	Hamada, Y., Kurita, H., Goto, S., Morimitsu, Y., Malaivijitnond, S., Pathonton, F., Pathontone, B., Kingsada, P., Vongsombath, C., Samouth, F., et al. 2010 Distribution and Present Status of Macaques in Lao PDR. In Conservation Primates in Indochina (eds. T. Nadler, B.M. Rawson & V.N. Thinh), p. 288. Hanoi, Frankfurt Zoological Society and Conservation International.	book_chapter
134	7	2005	9	2008	1	Lao PDR	Site 37, Central & Southern Laos	15.5	107.25	point	published	493	Hamada, Y., Kurita, H., Goto, S., Morimitsu, Y., Malaivijitnond, S., Pathonton, F., Pathontone, B., Kingsada, P., Vongsombath, C., Samouth, F., et al. 2010 Distribution and Present Status of Macaques in Lao PDR. In Conservation Primates in Indochina (eds. T. Nadler, B.M. Rawson & V.N. Thinh), p. 288. Hanoi, Frankfurt Zoological Society and Conservation International.	book_chapter
138	4	2009	11	2010	1	Thailand	Visitors Center, Khao Yai National Park	14.4638	101.366	point	published	742	Albert, A., Hambuckers, A., Culot, L., Savini, T. & Huynen, M.-C. 2013 Frugivory and Seed Dispersal by Northern Pigtailed Macaques (Macaca leonina), in Thailand. Int. J. Primatol. 34, 170-193. (doi:10.1007/s10764-012-9649-5).	peer_rev_pub
310	1	1986	12	2006	1	India	Locality record 9, Meghalaya	25.3887	90.4944	point	published	703	Choudhury, A. 2008 Ecology and behaviour of the pig-tailed macaque Macaca nemestrina leonina. J. Bombay Nat. Hist. Soc. 105, 279-291.	peer_rev_pub
311	1	1986	12	2006	1	India	Locality record 10, Meghalaya	25.5424	90.2829	point	published	703	Choudhury, A. 2008 Ecology and behaviour of the pig-tailed macaque Macaca nemestrina leonina. J. Bombay Nat. Hist. Soc. 105, 279-291.	peer_rev_pub
312	1	1986	12	2006	1	India	Locality record 11, Meghalaya	25.6638	90.4202	point	published	703	Choudhury, A. 2008 Ecology and behaviour of the pig-tailed macaque Macaca nemestrina leonina. J. Bombay Nat. Hist. Soc. 105, 279-291.	peer_rev_pub
313	1	1986	12	2006	1	India	Locality record 1, Assam	27.9168	95.8777	point	published	703	Choudhury, A. 2008 Ecology and behaviour of the pig-tailed macaque Macaca nemestrina leonina. J. Bombay Nat. Hist. Soc. 105, 279-291.	peer_rev_pub
314	1	1986	12	2006	1	India	Locality record 2, Assam	27.3279	95.8777	point	published	703	Choudhury, A. 2008 Ecology and behaviour of the pig-tailed macaque Macaca nemestrina leonina. J. Bombay Nat. Hist. Soc. 105, 279-291.	peer_rev_pub
315	1	1986	12	2006	1	India	Locality record 3, Assam	27.4157	95.7953	point	published	703	Choudhury, A. 2008 Ecology and behaviour of the pig-tailed macaque Macaca nemestrina leonina. J. Bombay Nat. Hist. Soc. 105, 279-291.	peer_rev_pub
316	1	1986	12	2006	1	India	Locality record 4, Assam	27.4693	95.7568	point	published	703	Choudhury, A. 2008 Ecology and behaviour of the pig-tailed macaque Macaca nemestrina leonina. J. Bombay Nat. Hist. Soc. 105, 279-291.	peer_rev_pub
317	1	1986	12	2006	1	India	Locality record 5, Assam	27.5765	95.7953	point	published	703	Choudhury, A. 2008 Ecology and behaviour of the pig-tailed macaque Macaca nemestrina leonina. J. Bombay Nat. Hist. Soc. 105, 279-291.	peer_rev_pub
318	1	1986	12	2006	1	India	Locality record 6, Assam	27.7613	95.6415	point	published	703	Choudhury, A. 2008 Ecology and behaviour of the pig-tailed macaque Macaca nemestrina leonina. J. Bombay Nat. Hist. Soc. 105, 279-291.	peer_rev_pub
319	1	1986	12	2006	1	India	Locality record 7, Assam	27.401	95.5536	point	published	703	Choudhury, A. 2008 Ecology and behaviour of the pig-tailed macaque Macaca nemestrina leonina. J. Bombay Nat. Hist. Soc. 105, 279-291.	peer_rev_pub
320	1	1986	12	2006	1	India	Locality record 8, Assam	27.3596	95.5975	point	published	703	Choudhury, A. 2008 Ecology and behaviour of the pig-tailed macaque Macaca nemestrina leonina. J. Bombay Nat. Hist. Soc. 105, 279-291.	peer_rev_pub
321	1	1986	12	2006	1	India	Locality record 9, Assam	27.6227	95.5055	point	published	703	Choudhury, A. 2008 Ecology and behaviour of the pig-tailed macaque Macaca nemestrina leonina. J. Bombay Nat. Hist. Soc. 105, 279-291.	peer_rev_pub
322	1	1986	12	2006	1	India	Locality record 10, Assam	27.1398	95.3366	point	published	703	Choudhury, A. 2008 Ecology and behaviour of the pig-tailed macaque Macaca nemestrina leonina. J. Bombay Nat. Hist. Soc. 105, 279-291.	peer_rev_pub
323	1	1986	12	2006	1	India	Locality record 11, Assam	26.9661	94.9905	point	published	703	Choudhury, A. 2008 Ecology and behaviour of the pig-tailed macaque Macaca nemestrina leonina. J. Bombay Nat. Hist. Soc. 105, 279-291.	peer_rev_pub
324	1	1986	12	2006	1	India	Locality record 12, Assam	24.2445	92.5131	point	published	703	Choudhury, A. 2008 Ecology and behaviour of the pig-tailed macaque Macaca nemestrina leonina. J. Bombay Nat. Hist. Soc. 105, 279-291.	peer_rev_pub
325	1	1986	12	2006	1	India	Locality record 13, Assam	24.3709	92.3264	point	published	703	Choudhury, A. 2008 Ecology and behaviour of the pig-tailed macaque Macaca nemestrina leonina. J. Bombay Nat. Hist. Soc. 105, 279-291.	peer_rev_pub
326	1	1986	12	2006	1	India	Locality record 14, Assam	24.5059	92.2522	point	published	703	Choudhury, A. 2008 Ecology and behaviour of the pig-tailed macaque Macaca nemestrina leonina. J. Bombay Nat. Hist. Soc. 105, 279-291.	peer_rev_pub
327	1	1986	12	2006	1	India	Locality record 15, Assam	24.257	92.4239	point	published	703	Choudhury, A. 2008 Ecology and behaviour of the pig-tailed macaque Macaca nemestrina leonina. J. Bombay Nat. Hist. Soc. 105, 279-291.	peer_rev_pub
328	1	1986	12	2006	1	India	Locality record 16, Assam	24.3671	92.4651	point	published	703	Choudhury, A. 2008 Ecology and behaviour of the pig-tailed macaque Macaca nemestrina leonina. J. Bombay Nat. Hist. Soc. 105, 279-291.	peer_rev_pub
329	1	1986	12	2006	1	India	Locality record 17, Assam	24.3846	92.5983	point	published	703	Choudhury, A. 2008 Ecology and behaviour of the pig-tailed macaque Macaca nemestrina leonina. J. Bombay Nat. Hist. Soc. 105, 279-291.	peer_rev_pub
330	1	1986	12	2006	1	India	Locality record 18, Assam	24.5134	92.682	point	published	703	Choudhury, A. 2008 Ecology and behaviour of the pig-tailed macaque Macaca nemestrina leonina. J. Bombay Nat. Hist. Soc. 105, 279-291.	peer_rev_pub
331	1	1986	12	2006	1	India	Locality record 19, Assam	24.5384	92.8331	point	published	703	Choudhury, A. 2008 Ecology and behaviour of the pig-tailed macaque Macaca nemestrina leonina. J. Bombay Nat. Hist. Soc. 105, 279-291.	peer_rev_pub
332	1	1986	12	2006	1	India	Locality record 20, Assam	24.5221	92.9334	point	published	703	Choudhury, A. 2008 Ecology and behaviour of the pig-tailed macaque Macaca nemestrina leonina. J. Bombay Nat. Hist. Soc. 105, 279-291.	peer_rev_pub
333	1	1986	12	2006	1	India	Locality record 21, Assam	24.859	92.98	point	published	703	Choudhury, A. 2008 Ecology and behaviour of the pig-tailed macaque Macaca nemestrina leonina. J. Bombay Nat. Hist. Soc. 105, 279-291.	peer_rev_pub
334	1	1986	12	2006	1	India	Locality record 22, Assam	24.7643	92.3071	point	published	703	Choudhury, A. 2008 Ecology and behaviour of the pig-tailed macaque Macaca nemestrina leonina. J. Bombay Nat. Hist. Soc. 105, 279-291.	peer_rev_pub
335	1	1986	12	2006	1	India	Locality record 23, Assam	25.1478	92.7274	point	published	703	Choudhury, A. 2008 Ecology and behaviour of the pig-tailed macaque Macaca nemestrina leonina. J. Bombay Nat. Hist. Soc. 105, 279-291.	peer_rev_pub
336	1	1986	12	2006	1	India	Locality record 24, Assam	25.1875	92.8537	point	published	703	Choudhury, A. 2008 Ecology and behaviour of the pig-tailed macaque Macaca nemestrina leonina. J. Bombay Nat. Hist. Soc. 105, 279-291.	peer_rev_pub
337	1	1986	12	2006	1	India	Locality record 25, Assam	25.1527	92.9471	point	published	703	Choudhury, A. 2008 Ecology and behaviour of the pig-tailed macaque Macaca nemestrina leonina. J. Bombay Nat. Hist. Soc. 105, 279-291.	peer_rev_pub
338	1	1986	12	2006	1	India	Locality record 26, Assam	25.282	93.0734	point	published	703	Choudhury, A. 2008 Ecology and behaviour of the pig-tailed macaque Macaca nemestrina leonina. J. Bombay Nat. Hist. Soc. 105, 279-291.	peer_rev_pub
339	1	1986	12	2006	1	India	Locality record 27, Assam	25.4234	92.9608	point	published	703	Choudhury, A. 2008 Ecology and behaviour of the pig-tailed macaque Macaca nemestrina leonina. J. Bombay Nat. Hist. Soc. 105, 279-291.	peer_rev_pub
340	1	1986	12	2006	1	India	Locality record 28, Assam	25.3043	93.2877	point	published	703	Choudhury, A. 2008 Ecology and behaviour of the pig-tailed macaque Macaca nemestrina leonina. J. Bombay Nat. Hist. Soc. 105, 279-291.	peer_rev_pub
341	1	1986	12	2006	1	India	Locality record 29, Assam	25.2447	93.1888	point	published	703	Choudhury, A. 2008 Ecology and behaviour of the pig-tailed macaque Macaca nemestrina leonina. J. Bombay Nat. Hist. Soc. 105, 279-291.	peer_rev_pub
342	1	1986	12	2006	1	India	Locality record 30, Assam	25.0806	93.1805	point	published	703	Choudhury, A. 2008 Ecology and behaviour of the pig-tailed macaque Macaca nemestrina leonina. J. Bombay Nat. Hist. Soc. 105, 279-291.	peer_rev_pub
343	1	1986	12	2006	1	India	Locality record 31, Assam	26.0321	90.5219	point	published	703	Choudhury, A. 2008 Ecology and behaviour of the pig-tailed macaque Macaca nemestrina leonina. J. Bombay Nat. Hist. Soc. 105, 279-291.	peer_rev_pub
344	1	1986	12	2006	1	India	Locality record 32, Assam	25.8741	91.3074	point	published	703	Choudhury, A. 2008 Ecology and behaviour of the pig-tailed macaque Macaca nemestrina leonina. J. Bombay Nat. Hist. Soc. 105, 279-291.	peer_rev_pub
345	1	1986	12	2006	1	India	Locality record 33, Assam	25.9827	91.6974	point	published	703	Choudhury, A. 2008 Ecology and behaviour of the pig-tailed macaque Macaca nemestrina leonina. J. Bombay Nat. Hist. Soc. 105, 279-291.	peer_rev_pub
346	1	1986	12	2006	1	India	Locality record 34, Assam	26.0716	91.983	point	published	703	Choudhury, A. 2008 Ecology and behaviour of the pig-tailed macaque Macaca nemestrina leonina. J. Bombay Nat. Hist. Soc. 105, 279-291.	peer_rev_pub
347	1	1986	12	2006	1	India	Locality record 35, Assam	26.0963	92.1753	point	published	703	Choudhury, A. 2008 Ecology and behaviour of the pig-tailed macaque Macaca nemestrina leonina. J. Bombay Nat. Hist. Soc. 105, 279-291.	peer_rev_pub
348	1	1986	12	2006	1	India	Locality record 36, Assam	25.6069	92.6312	point	published	703	Choudhury, A. 2008 Ecology and behaviour of the pig-tailed macaque Macaca nemestrina leonina. J. Bombay Nat. Hist. Soc. 105, 279-291.	peer_rev_pub
349	1	1986	12	2006	1	India	Locality record 37, Assam	25.4036	92.7466	point	published	703	Choudhury, A. 2008 Ecology and behaviour of the pig-tailed macaque Macaca nemestrina leonina. J. Bombay Nat. Hist. Soc. 105, 279-291.	peer_rev_pub
350	1	1986	12	2006	1	India	Locality record 38, Assam	25.6465	93.3563	point	published	703	Choudhury, A. 2008 Ecology and behaviour of the pig-tailed macaque Macaca nemestrina leonina. J. Bombay Nat. Hist. Soc. 105, 279-291.	peer_rev_pub
351	1	1986	12	2006	1	India	Locality record 39, Assam	25.7207	93.4662	point	published	703	Choudhury, A. 2008 Ecology and behaviour of the pig-tailed macaque Macaca nemestrina leonina. J. Bombay Nat. Hist. Soc. 105, 279-291.	peer_rev_pub
352	1	1986	12	2006	1	India	Locality record 40, Assam	25.6712	93.0322	point	published	703	Choudhury, A. 2008 Ecology and behaviour of the pig-tailed macaque Macaca nemestrina leonina. J. Bombay Nat. Hist. Soc. 105, 279-291.	peer_rev_pub
353	1	1986	12	2006	1	India	Locality record 41, Assam	25.7949	93.4799	point	published	703	Choudhury, A. 2008 Ecology and behaviour of the pig-tailed macaque Macaca nemestrina leonina. J. Bombay Nat. Hist. Soc. 105, 279-291.	peer_rev_pub
354	1	1986	12	2006	1	India	Locality record 42, Assam	26.446	93.6255	point	published	703	Choudhury, A. 2008 Ecology and behaviour of the pig-tailed macaque Macaca nemestrina leonina. J. Bombay Nat. Hist. Soc. 105, 279-291.	peer_rev_pub
355	1	1986	12	2006	1	India	Locality record 43, Assam	26.4361	93.4167	point	published	703	Choudhury, A. 2008 Ecology and behaviour of the pig-tailed macaque Macaca nemestrina leonina. J. Bombay Nat. Hist. Soc. 105, 279-291.	peer_rev_pub
356	1	1986	12	2006	1	India	Locality record 44, Assam	26.5836	93.4525	point	published	703	Choudhury, A. 2008 Ecology and behaviour of the pig-tailed macaque Macaca nemestrina leonina. J. Bombay Nat. Hist. Soc. 105, 279-291.	peer_rev_pub
360	1	1986	12	2006	1	India	Locality record 1, Nagaland	26.8829	95.0235	point	published	703	Choudhury, A. 2008 Ecology and behaviour of the pig-tailed macaque Macaca nemestrina leonina. J. Bombay Nat. Hist. Soc. 105, 279-291.	peer_rev_pub
357	1	1986	12	2006	1	India	Locality record 45, Assam	26.6254	93.3783	point	published	703	Choudhury, A. 2008 Ecology and behaviour of the pig-tailed macaque Macaca nemestrina leonina. J. Bombay Nat. Hist. Soc. 105, 279-291.	peer_rev_pub
361	1	1986	12	2006	1	India	Locality record 2, Nagaland	26.5787	94.4879	point	published	703	Choudhury, A. 2008 Ecology and behaviour of the pig-tailed macaque Macaca nemestrina leonina. J. Bombay Nat. Hist. Soc. 105, 279-291.	peer_rev_pub
358	1	1986	12	2006	1	India	Locality record 46, Assam	26.4411	92.9553	point	published	703	Choudhury, A. 2008 Ecology and behaviour of the pig-tailed macaque Macaca nemestrina leonina. J. Bombay Nat. Hist. Soc. 105, 279-291.	peer_rev_pub
362	1	1986	12	2006	1	India	Locality record 3, Nagaland	26.4116	94.4659	point	published	703	Choudhury, A. 2008 Ecology and behaviour of the pig-tailed macaque Macaca nemestrina leonina. J. Bombay Nat. Hist. Soc. 105, 279-291.	peer_rev_pub
359	1	1986	12	2006	1	India	Locality record 47, Assam	26.5443	93.186	point	published	703	Choudhury, A. 2008 Ecology and behaviour of the pig-tailed macaque Macaca nemestrina leonina. J. Bombay Nat. Hist. Soc. 105, 279-291.	peer_rev_pub
363	1	1986	12	2006	1	India	Locality record 4, Nagaland	26.1456	95.0043	point	published	703	Choudhury, A. 2008 Ecology and behaviour of the pig-tailed macaque Macaca nemestrina leonina. J. Bombay Nat. Hist. Soc. 105, 279-291.	peer_rev_pub
364	1	1986	12	2006	1	India	Locality record 5, Nagaland	25.7306	94.801	point	published	703	Choudhury, A. 2008 Ecology and behaviour of the pig-tailed macaque Macaca nemestrina leonina. J. Bombay Nat. Hist. Soc. 105, 279-291.	peer_rev_pub
365	1	1986	12	2006	1	India	Locality record 6, Nagaland	25.9457	94.1144	point	published	703	Choudhury, A. 2008 Ecology and behaviour of the pig-tailed macaque Macaca nemestrina leonina. J. Bombay Nat. Hist. Soc. 105, 279-291.	peer_rev_pub
366	1	1986	12	2006	1	India	Locality record 7, Nagaland	25.7257	94.2352	point	published	703	Choudhury, A. 2008 Ecology and behaviour of the pig-tailed macaque Macaca nemestrina leonina. J. Bombay Nat. Hist. Soc. 105, 279-291.	peer_rev_pub
367	1	1986	12	2006	1	India	Locality record 8, Nagaland	26.0987	94.6609	point	published	703	Choudhury, A. 2008 Ecology and behaviour of the pig-tailed macaque Macaca nemestrina leonina. J. Bombay Nat. Hist. Soc. 105, 279-291.	peer_rev_pub
368	1	1986	12	2006	1	India	Locality record 9, Nagaland	25.5499	93.4964	point	published	703	Choudhury, A. 2008 Ecology and behaviour of the pig-tailed macaque Macaca nemestrina leonina. J. Bombay Nat. Hist. Soc. 105, 279-291.	peer_rev_pub
369	1	1986	12	2006	1	India	Locality record 1, Arunachal Pradesh	28.2608	96.037	point	published	703	Choudhury, A. 2008 Ecology and behaviour of the pig-tailed macaque Macaca nemestrina leonina. J. Bombay Nat. Hist. Soc. 105, 279-291.	peer_rev_pub
370	1	1986	12	2006	1	India	Locality record 2, Arunachal Pradesh	28.2028	96.2457	point	published	703	Choudhury, A. 2008 Ecology and behaviour of the pig-tailed macaque Macaca nemestrina leonina. J. Bombay Nat. Hist. Soc. 105, 279-291.	peer_rev_pub
371	1	1986	12	2006	1	India	Locality record 3, Arunachal Pradesh	27.8585	96.5533	point	published	703	Choudhury, A. 2008 Ecology and behaviour of the pig-tailed macaque Macaca nemestrina leonina. J. Bombay Nat. Hist. Soc. 105, 279-291.	peer_rev_pub
372	1	1986	12	2006	1	India	Locality record 4, Arunachal Pradesh	27.6835	96.416	point	published	703	Choudhury, A. 2008 Ecology and behaviour of the pig-tailed macaque Macaca nemestrina leonina. J. Bombay Nat. Hist. Soc. 105, 279-291.	peer_rev_pub
373	1	1986	12	2006	1	India	Locality record 5, Arunachal Pradesh	27.5619	96.3831	point	published	703	Choudhury, A. 2008 Ecology and behaviour of the pig-tailed macaque Macaca nemestrina leonina. J. Bombay Nat. Hist. Soc. 105, 279-291.	peer_rev_pub
374	1	1986	12	2006	1	India	Locality record 6, Arunachal Pradesh	27.4108	96.4709	point	published	703	Choudhury, A. 2008 Ecology and behaviour of the pig-tailed macaque Macaca nemestrina leonina. J. Bombay Nat. Hist. Soc. 105, 279-291.	peer_rev_pub
375	1	1986	12	2006	1	India	Locality record 7, Arunachal Pradesh	27.4498	96.7126	point	published	703	Choudhury, A. 2008 Ecology and behaviour of the pig-tailed macaque Macaca nemestrina leonina. J. Bombay Nat. Hist. Soc. 105, 279-291.	peer_rev_pub
376	1	1986	12	2006	1	India	Locality record 8, Arunachal Pradesh	27.4742	96.3281	point	published	703	Choudhury, A. 2008 Ecology and behaviour of the pig-tailed macaque Macaca nemestrina leonina. J. Bombay Nat. Hist. Soc. 105, 279-291.	peer_rev_pub
377	1	1986	12	2006	1	India	Locality record 9, Arunachal Pradesh	27.7565	96.1908	point	published	703	Choudhury, A. 2008 Ecology and behaviour of the pig-tailed macaque Macaca nemestrina leonina. J. Bombay Nat. Hist. Soc. 105, 279-291.	peer_rev_pub
378	1	1986	12	2006	1	India	Locality record 10, Arunachal Pradesh	27.8002	95.9546	point	published	703	Choudhury, A. 2008 Ecology and behaviour of the pig-tailed macaque Macaca nemestrina leonina. J. Bombay Nat. Hist. Soc. 105, 279-291.	peer_rev_pub
379	1	1986	12	2006	1	India	Locality record 11, Arunachal Pradesh	27.2449	96.0095	point	published	703	Choudhury, A. 2008 Ecology and behaviour of the pig-tailed macaque Macaca nemestrina leonina. J. Bombay Nat. Hist. Soc. 105, 279-291.	peer_rev_pub
380	1	1986	12	2006	1	India	Locality record 12, Arunachal Pradesh	27.2058	95.5536	point	published	703	Choudhury, A. 2008 Ecology and behaviour of the pig-tailed macaque Macaca nemestrina leonina. J. Bombay Nat. Hist. Soc. 105, 279-291.	peer_rev_pub
381	1	1986	12	2006	1	India	Locality record 13, Arunachal Pradesh	27.0787	95.5151	point	published	703	Choudhury, A. 2008 Ecology and behaviour of the pig-tailed macaque Macaca nemestrina leonina. J. Bombay Nat. Hist. Soc. 105, 279-291.	peer_rev_pub
382	1	1986	12	2006	1	India	Main Study Site 1, Assam	27.5363	95.5193	point	published	703	Choudhury, A. 2008 Ecology and behaviour of the pig-tailed macaque Macaca nemestrina leonina. J. Bombay Nat. Hist. Soc. 105, 279-291.	peer_rev_pub
383	1	1986	12	2006	1	India	Main Study Site 2, Assam (BBP Wildlife Sanctuary)	27.4778	95.349	point	published	703	Choudhury, A. 2008 Ecology and behaviour of the pig-tailed macaque Macaca nemestrina leonina. J. Bombay Nat. Hist. Soc. 105, 279-291.	peer_rev_pub
384	1	1986	12	2006	1	India	Main Study Site 3, Assam	27.4534	95.4987	point	published	703	Choudhury, A. 2008 Ecology and behaviour of the pig-tailed macaque Macaca nemestrina leonina. J. Bombay Nat. Hist. Soc. 105, 279-291.	peer_rev_pub
385	1	1986	12	2006	1	India	Main Study Site 4, Assam	27.2546	95.4739	point	published	703	Choudhury, A. 2008 Ecology and behaviour of the pig-tailed macaque Macaca nemestrina leonina. J. Bombay Nat. Hist. Soc. 105, 279-291.	peer_rev_pub
386	1	1986	12	2006	1	India	Main Study Site 5, Assam (Gibbon Wildlife Sanctuary)	26.6916	94.3396	point	published	703	Choudhury, A. 2008 Ecology and behaviour of the pig-tailed macaque Macaca nemestrina leonina. J. Bombay Nat. Hist. Soc. 105, 279-291.	peer_rev_pub
387	1	1986	12	2006	1	India	Main Study Site 6, Assam (Nambor?)	26.3869	93.8644	point	published	703	Choudhury, A. 2008 Ecology and behaviour of the pig-tailed macaque Macaca nemestrina leonina. J. Bombay Nat. Hist. Soc. 105, 279-291.	peer_rev_pub
388	1	1986	12	2006	1	India	Main Study Site 7, Assam	24.632	92.2522	point	published	703	Choudhury, A. 2008 Ecology and behaviour of the pig-tailed macaque Macaca nemestrina leonina. J. Bombay Nat. Hist. Soc. 105, 279-291.	peer_rev_pub
271	1	1992	12	1994	1	India	Study site 1, Hollongapar Gibbon Sanctuary	26.75	94.4167	point	published	703	Choudhury, A. 2008 Ecology and behaviour of the pig-tailed macaque Macaca nemestrina leonina. J. Bombay Nat. Hist. Soc. 105, 279-291.	peer_rev_pub
273	1	1992	12	1994	1	India	Study site 3, Upper Dihing (west block) research forest	27.3333	95.5	point	published	703	Choudhury, A. 2008 Ecology and behaviour of the pig-tailed macaque Macaca nemestrina leonina. J. Bombay Nat. Hist. Soc. 105, 279-291.	peer_rev_pub
274	2	1992	2	1992	1	India	Study site 4, Garampani and Nambor wildlife sanctuary	26.3833	93.8667	point	published	703	Choudhury, A. 2008 Ecology and behaviour of the pig-tailed macaque Macaca nemestrina leonina. J. Bombay Nat. Hist. Soc. 105, 279-291.	peer_rev_pub
275	1	1992	12	1994	1	India	Study site 5, Patharia Hill reserve forest	24.6667	92.25	point	published	703	Choudhury, A. 2008 Ecology and behaviour of the pig-tailed macaque Macaca nemestrina leonina. J. Bombay Nat. Hist. Soc. 105, 279-291.	peer_rev_pub
276	1	1986	12	2006	1	India	Locality record 1, Mizoram	24.3496	92.9608	point	published	703	Choudhury, A. 2008 Ecology and behaviour of the pig-tailed macaque Macaca nemestrina leonina. J. Bombay Nat. Hist. Soc. 105, 279-291.	peer_rev_pub
277	1	1986	12	2006	1	India	Locality record 2, Mizoram	24.3546	92.8784	point	published	703	Choudhury, A. 2008 Ecology and behaviour of the pig-tailed macaque Macaca nemestrina leonina. J. Bombay Nat. Hist. Soc. 105, 279-291.	peer_rev_pub
278	1	1986	12	2006	1	India	Locality record 3, Mizoram	24.1994	92.6422	point	published	703	Choudhury, A. 2008 Ecology and behaviour of the pig-tailed macaque Macaca nemestrina leonina. J. Bombay Nat. Hist. Soc. 105, 279-291.	peer_rev_pub
279	1	1986	12	2006	1	India	Locality record 4, Mizoram	23.559	92.3785	point	published	703	Choudhury, A. 2008 Ecology and behaviour of the pig-tailed macaque Macaca nemestrina leonina. J. Bombay Nat. Hist. Soc. 105, 279-291.	peer_rev_pub
280	1	1986	12	2006	1	India	Locality record 5, Mizoram	23.8306	93.2382	point	published	703	Choudhury, A. 2008 Ecology and behaviour of the pig-tailed macaque Macaca nemestrina leonina. J. Bombay Nat. Hist. Soc. 105, 279-291.	peer_rev_pub
281	1	1986	12	2006	1	India	Locality record 6, Mizoram	23.6294	93.3096	point	published	703	Choudhury, A. 2008 Ecology and behaviour of the pig-tailed macaque Macaca nemestrina leonina. J. Bombay Nat. Hist. Soc. 105, 279-291.	peer_rev_pub
282	1	1986	12	2006	1	India	Locality record 7, Mizoram	22.5531	93.035	point	published	703	Choudhury, A. 2008 Ecology and behaviour of the pig-tailed macaque Macaca nemestrina leonina. J. Bombay Nat. Hist. Soc. 105, 279-291.	peer_rev_pub
283	1	1986	12	2006	1	India	Locality record 8, Mizoram	22.2561	92.8949	point	published	703	Choudhury, A. 2008 Ecology and behaviour of the pig-tailed macaque Macaca nemestrina leonina. J. Bombay Nat. Hist. Soc. 105, 279-291.	peer_rev_pub
284	1	1986	12	2006	1	India	Locality record 9, Mizoram	22.3298	92.7466	point	published	703	Choudhury, A. 2008 Ecology and behaviour of the pig-tailed macaque Macaca nemestrina leonina. J. Bombay Nat. Hist. Soc. 105, 279-291.	peer_rev_pub
285	1	1986	12	2006	1	India	Locality record 10, Mizoram	22.4973	92.6999	point	published	703	Choudhury, A. 2008 Ecology and behaviour of the pig-tailed macaque Macaca nemestrina leonina. J. Bombay Nat. Hist. Soc. 105, 279-291.	peer_rev_pub
286	1	1986	12	2006	1	India	Locality record 1, Manipur	25.0483	94.6692	point	published	703	Choudhury, A. 2008 Ecology and behaviour of the pig-tailed macaque Macaca nemestrina leonina. J. Bombay Nat. Hist. Soc. 105, 279-291.	peer_rev_pub
287	1	1986	12	2006	1	India	Locality record 2, Manipur	24.9686	94.5209	point	published	703	Choudhury, A. 2008 Ecology and behaviour of the pig-tailed macaque Macaca nemestrina leonina. J. Bombay Nat. Hist. Soc. 105, 279-291.	peer_rev_pub
288	1	1986	12	2006	1	India	Locality record 3, Manipur	24.3721	94.2517	point	published	703	Choudhury, A. 2008 Ecology and behaviour of the pig-tailed macaque Macaca nemestrina leonina. J. Bombay Nat. Hist. Soc. 105, 279-291.	peer_rev_pub
289	1	1986	12	2006	1	India	Locality record 4, Manipur	24.2745	93.5898	point	published	703	Choudhury, A. 2008 Ecology and behaviour of the pig-tailed macaque Macaca nemestrina leonina. J. Bombay Nat. Hist. Soc. 105, 279-291.	peer_rev_pub
290	1	1986	12	2006	1	India	Locality record 5, Manipur	24.4521	93.2877	point	published	703	Choudhury, A. 2008 Ecology and behaviour of the pig-tailed macaque Macaca nemestrina leonina. J. Bombay Nat. Hist. Soc. 105, 279-291.	peer_rev_pub
291	1	1986	12	2006	1	India	Locality record 6, Manipur	25.1005	93.4195	point	published	703	Choudhury, A. 2008 Ecology and behaviour of the pig-tailed macaque Macaca nemestrina leonina. J. Bombay Nat. Hist. Soc. 105, 279-291.	peer_rev_pub
292	1	1986	12	2006	1	India	Locality record 7, Manipur	25.0483	93.7024	point	published	703	Choudhury, A. 2008 Ecology and behaviour of the pig-tailed macaque Macaca nemestrina leonina. J. Bombay Nat. Hist. Soc. 105, 279-291.	peer_rev_pub
293	1	1986	12	2006	1	India	Locality record 8, Manipur	24.9437	93.62	point	published	703	Choudhury, A. 2008 Ecology and behaviour of the pig-tailed macaque Macaca nemestrina leonina. J. Bombay Nat. Hist. Soc. 105, 279-291.	peer_rev_pub
294	1	1986	12	2006	1	India	Locality record 9, Manipur	24.9736	93.3041	point	published	703	Choudhury, A. 2008 Ecology and behaviour of the pig-tailed macaque Macaca nemestrina leonina. J. Bombay Nat. Hist. Soc. 105, 279-291.	peer_rev_pub
295	1	1986	12	2006	1	India	Locality record 1, Tripura	23.3549	91.409	point	published	703	Choudhury, A. 2008 Ecology and behaviour of the pig-tailed macaque Macaca nemestrina leonina. J. Bombay Nat. Hist. Soc. 105, 279-291.	peer_rev_pub
296	1	1986	12	2006	1	India	Locality record 2, Tripura	23.3095	91.4996	point	published	703	Choudhury, A. 2008 Ecology and behaviour of the pig-tailed macaque Macaca nemestrina leonina. J. Bombay Nat. Hist. Soc. 105, 279-291.	peer_rev_pub
297	1	1986	12	2006	1	India	Locality record 3, Tripura	23.2767	91.6562	point	published	703	Choudhury, A. 2008 Ecology and behaviour of the pig-tailed macaque Macaca nemestrina leonina. J. Bombay Nat. Hist. Soc. 105, 279-291.	peer_rev_pub
298	1	1986	12	2006	1	India	Locality record 4, Tripura	23.6168	91.8292	point	published	703	Choudhury, A. 2008 Ecology and behaviour of the pig-tailed macaque Macaca nemestrina leonina. J. Bombay Nat. Hist. Soc. 105, 279-291.	peer_rev_pub
299	1	1986	12	2006	1	India	Locality record 5, Tripura	24.1167	92.0956	point	published	703	Choudhury, A. 2008 Ecology and behaviour of the pig-tailed macaque Macaca nemestrina leonina. J. Bombay Nat. Hist. Soc. 105, 279-291.	peer_rev_pub
300	1	1986	12	2006	1	India	Locality record 6, Tripura	23.9812	91.9199	point	published	703	Choudhury, A. 2008 Ecology and behaviour of the pig-tailed macaque Macaca nemestrina leonina. J. Bombay Nat. Hist. Soc. 105, 279-291.	peer_rev_pub
301	1	1986	12	2006	1	India	Locality record 7, Tripura	23.6917	91.3579	point	published	703	Choudhury, A. 2008 Ecology and behaviour of the pig-tailed macaque Macaca nemestrina leonina. J. Bombay Nat. Hist. Soc. 105, 279-291.	peer_rev_pub
302	1	1986	12	2006	1	India	Locality record 1, Meghalaya	25.1701	92.4664	point	published	703	Choudhury, A. 2008 Ecology and behaviour of the pig-tailed macaque Macaca nemestrina leonina. J. Bombay Nat. Hist. Soc. 105, 279-291.	peer_rev_pub
303	1	1986	12	2006	1	India	Locality record 2, Meghalaya	25.1552	92.2824	point	published	703	Choudhury, A. 2008 Ecology and behaviour of the pig-tailed macaque Macaca nemestrina leonina. J. Bombay Nat. Hist. Soc. 105, 279-291.	peer_rev_pub
304	1	1986	12	2006	1	India	Locality record 3, Meghalaya	25.1975	92.6285	point	published	703	Choudhury, A. 2008 Ecology and behaviour of the pig-tailed macaque Macaca nemestrina leonina. J. Bombay Nat. Hist. Soc. 105, 279-291.	peer_rev_pub
305	1	1986	12	2006	1	India	Locality record 4, Meghalaya	25.6737	92.0023	point	published	703	Choudhury, A. 2008 Ecology and behaviour of the pig-tailed macaque Macaca nemestrina leonina. J. Bombay Nat. Hist. Soc. 105, 279-291.	peer_rev_pub
306	1	1986	12	2006	1	India	Locality record 5, Meghalaya	25.8197	91.7825	point	published	703	Choudhury, A. 2008 Ecology and behaviour of the pig-tailed macaque Macaca nemestrina leonina. J. Bombay Nat. Hist. Soc. 105, 279-291.	peer_rev_pub
307	1	1986	12	2006	1	India	Locality record 6, Meghalaya	25.2993	91.7908	point	published	703	Choudhury, A. 2008 Ecology and behaviour of the pig-tailed macaque Macaca nemestrina leonina. J. Bombay Nat. Hist. Soc. 105, 279-291.	peer_rev_pub
308	1	1986	12	2006	1	India	Locality record 7, Meghalaya	25.3242	90.7553	point	published	703	Choudhury, A. 2008 Ecology and behaviour of the pig-tailed macaque Macaca nemestrina leonina. J. Bombay Nat. Hist. Soc. 105, 279-291.	peer_rev_pub
309	1	1986	12	2006	1	India	Locality record 8, Meghalaya	25.2621	90.6042	point	published	703	Choudhury, A. 2008 Ecology and behaviour of the pig-tailed macaque Macaca nemestrina leonina. J. Bombay Nat. Hist. Soc. 105, 279-291.	peer_rev_pub
389	7	1992	9	1993	1	India	Borajan, Bherjan-Borajan-Podumoni Wildlife Sanctuary, Tinsukia District, E Assam	27.3718	95.386	point	published	703	Choudhury, A. 2008 Ecology and behaviour of the pig-tailed macaque Macaca nemestrina leonina. J. Bombay Nat. Hist. Soc. 105, 279-291.	peer_rev_pub
390	7	1992	9	1993	1	India	Upper Dihing, Bherjan-Borajan-Podumoni Wildlife Sanctuary, Tinsukia District, E Assam	27.4169	95.8035	point	published	703	Choudhury, A. 2008 Ecology and behaviour of the pig-tailed macaque Macaca nemestrina leonina. J. Bombay Nat. Hist. Soc. 105, 279-291.	peer_rev_pub
391	7	1992	9	1993	1	India	Nambor, Bherjan-Borajan-Podumoni Wildlife Sanctuary, Tinsukia District, E Assam	27.4023	95.8612	point	published	703	Choudhury, A. 2008 Ecology and behaviour of the pig-tailed macaque Macaca nemestrina leonina. J. Bombay Nat. Hist. Soc. 105, 279-291.	peer_rev_pub
254	11	1996	9	1998	1	India	Narpuh Reserved Forest, Jaintia Hills district, Meghalaya	25.1035	92.416	polygon	published	19	Choudhury, A. 1998 A survey of primates in the Jaintia Hills. ASP Bulletin 22, 2.	peer_rev_pub
228	1	1994	12	1999	1	India	Dibru-Saikhowa national park, Assam	27.6716	95.3624	polygon	published	18	Choudhury, A. 2001 Primates in northeast India: An overview of their distribution and conservation status. ENVIS Bulletin: Wildlife and Protected Areas 1, 10.	peer_rev_pub
230	1	1994	12	1999	1	India	Garampani wildlife sanctuary, Assam	26.404	93.8835	polygon	published	18	Choudhury, A. 2001 Primates in northeast India: An overview of their distribution and conservation status. ENVIS Bulletin: Wildlife and Protected Areas 1, 10.	peer_rev_pub
232	1	1994	12	1999	1	India	Karbi Anglong wildlife sanctuary, Assam	26.4204	93.3677	polygon	published	18	Choudhury, A. 2001 Primates in northeast India: An overview of their distribution and conservation status. ENVIS Bulletin: Wildlife and Protected Areas 1, 10.	peer_rev_pub
234	1	1994	12	1999	1	India	Kamlang wildlife sanctuary, Arunachal Pradesh	27.744	96.3329	point	published	18	Choudhury, A. 2001 Primates in northeast India: An overview of their distribution and conservation status. ENVIS Bulletin: Wildlife and Protected Areas 1, 10.	peer_rev_pub
237	1	1994	12	1999	1	India	Namdapha wildlife sanctuary, Arunachal Pradesh	27.6339	96.1011	polygon	published	18	Choudhury, A. 2001 Primates in northeast India: An overview of their distribution and conservation status. ENVIS Bulletin: Wildlife and Protected Areas 1, 10.	peer_rev_pub
238	1	1994	12	1999	1	India	Jiri-makru wildlife sanctuary, Manipur	25.1992	93.4252	polygon	published	18	Choudhury, A. 2001 Primates in northeast India: An overview of their distribution and conservation status. ENVIS Bulletin: Wildlife and Protected Areas 1, 10.	peer_rev_pub
239	1	1994	12	1999	1	India	Keilam Hill wildlife sanctuary, Manipur	24.3059	93.4088	polygon	published	18	Choudhury, A. 2001 Primates in northeast India: An overview of their distribution and conservation status. ENVIS Bulletin: Wildlife and Protected Areas 1, 10.	peer_rev_pub
240	1	1994	12	1999	1	India	Yangoupokpi-Lockchao wildlife sanctuary, Manipur	24.3312	94.2877	polygon	published	18	Choudhury, A. 2001 Primates in northeast India: An overview of their distribution and conservation status. ENVIS Bulletin: Wildlife and Protected Areas 1, 10.	peer_rev_pub
241	1	1994	12	1999	1	India	Balpakram national park, Meghalaya	25.2625	90.8171	polygon	published	18	Choudhury, A. 2001 Primates in northeast India: An overview of their distribution and conservation status. ENVIS Bulletin: Wildlife and Protected Areas 1, 10.	peer_rev_pub
242	1	1994	12	1999	1	India	Nokrek national park, Meghalaya	25.4637	90.3667	polygon	published	18	Choudhury, A. 2001 Primates in northeast India: An overview of their distribution and conservation status. ENVIS Bulletin: Wildlife and Protected Areas 1, 10.	peer_rev_pub
243	1	1994	12	1999	1	India	Nongkhyllem wildlife sanctuary, Meghalaya	25.9253	91.8173	polygon	published	18	Choudhury, A. 2001 Primates in northeast India: An overview of their distribution and conservation status. ENVIS Bulletin: Wildlife and Protected Areas 1, 10.	peer_rev_pub
244	1	1994	12	1999	1	India	Siju wildlife sanctuary, Meghalaya	25.3372	90.6877	point	published	18	Choudhury, A. 2001 Primates in northeast India: An overview of their distribution and conservation status. ENVIS Bulletin: Wildlife and Protected Areas 1, 10.	peer_rev_pub
245	1	1994	12	1999	1	India	Dama wildlife sanctuary, Mizoram	23.5997	92.3992	polygon	published	18	Choudhury, A. 2001 Primates in northeast India: An overview of their distribution and conservation status. ENVIS Bulletin: Wildlife and Protected Areas 1, 10.	peer_rev_pub
247	1	1994	12	1999	1	India	Pawngpi (Blue Mountain) national park, Mizoram	23.4004	92.7184	polygon	published	18	Choudhury, A. 2001 Primates in northeast India: An overview of their distribution and conservation status. ENVIS Bulletin: Wildlife and Protected Areas 1, 10.	peer_rev_pub
248	1	1994	12	1999	1	India	Intanka wildlife sanctuary, Nagaland	25.5364	93.5517	polygon	published	18	Choudhury, A. 2001 Primates in northeast India: An overview of their distribution and conservation status. ENVIS Bulletin: Wildlife and Protected Areas 1, 10.	peer_rev_pub
249	1	1994	12	1999	1	India	Sepahijala wildlife sanctuary, Tripura	23.6675	91.3197	wide area	published	18	Choudhury, A. 2001 Primates in northeast India: An overview of their distribution and conservation status. ENVIS Bulletin: Wildlife and Protected Areas 1, 10.	peer_rev_pub
250	1	1994	12	1999	1	India	Trishna wildlife sanctuary, Tripura	23.2795	91.4017	point	published	18	Choudhury, A. 2001 Primates in northeast India: An overview of their distribution and conservation status. ENVIS Bulletin: Wildlife and Protected Areas 1, 10.	peer_rev_pub
23	1	2004	12	2008	1	Vietnam	Kon Ka Kinh Natural Reserve, Gia Lai	14.15	108.267	point	published	682	Son, V.D., Malaivijitnond, S., Gotoh, S., Tri, C.Q., Hung, N.V., Hoang, L.V., Trang, T.C. & Hamada, Y. 2009 Report on Present Distribution and Status of Macaques in Vietnam. Laboratory Primate Newsletter 48, 10-14.	peer_rev_pub
24	1	2004	12	2008	1	Vietnam	Kapakloi, Kon Tum	14.4133	108.008	point	published	682	Son, V.D., Malaivijitnond, S., Gotoh, S., Tri, C.Q., Hung, N.V., Hoang, L.V., Trang, T.C. & Hamada, Y. 2009 Report on Present Distribution and Status of Macaques in Vietnam. Laboratory Primate Newsletter 48, 10-14.	peer_rev_pub
25	1	2004	12	2008	1	Vietnam	Phan Chu Trinh, Kon Tum	14.3525	108.016	point	published	682	Son, V.D., Malaivijitnond, S., Gotoh, S., Tri, C.Q., Hung, N.V., Hoang, L.V., Trang, T.C. & Hamada, Y. 2009 Report on Present Distribution and Status of Macaques in Vietnam. Laboratory Primate Newsletter 48, 10-14.	peer_rev_pub
26	1	2004	12	2008	1	Vietnam	Ly Thuong Kiet, Kon Tum	14.3534	108.001	point	published	682	Son, V.D., Malaivijitnond, S., Gotoh, S., Tri, C.Q., Hung, N.V., Hoang, L.V., Trang, T.C. & Hamada, Y. 2009 Report on Present Distribution and Status of Macaques in Vietnam. Laboratory Primate Newsletter 48, 10-14.	peer_rev_pub
27	1	2004	12	2008	1	Vietnam	Tu Vien Paolo, Kon Tum	14.3475	108.006	point	published	682	Son, V.D., Malaivijitnond, S., Gotoh, S., Tri, C.Q., Hung, N.V., Hoang, L.V., Trang, T.C. & Hamada, Y. 2009 Report on Present Distribution and Status of Macaques in Vietnam. Laboratory Primate Newsletter 48, 10-14.	peer_rev_pub
28	1	2004	12	2008	1	Vietnam	12 Nguyen Trai, Kon Tum	14.3465	108.007	point	published	682	Son, V.D., Malaivijitnond, S., Gotoh, S., Tri, C.Q., Hung, N.V., Hoang, L.V., Trang, T.C. & Hamada, Y. 2009 Report on Present Distribution and Status of Macaques in Vietnam. Laboratory Primate Newsletter 48, 10-14.	peer_rev_pub
29	1	2004	12	2008	1	Vietnam	239 Tran Hung Dao, Kon Tum	14.537	108.003	point	published	682	Son, V.D., Malaivijitnond, S., Gotoh, S., Tri, C.Q., Hung, N.V., Hoang, L.V., Trang, T.C. & Hamada, Y. 2009 Report on Present Distribution and Status of Macaques in Vietnam. Laboratory Primate Newsletter 48, 10-14.	peer_rev_pub
30	1	2004	12	2008	1	Vietnam	Dac Phia, Dak Ha, Kon Tum	14.5028	108.007	point	published	682	Son, V.D., Malaivijitnond, S., Gotoh, S., Tri, C.Q., Hung, N.V., Hoang, L.V., Trang, T.C. & Hamada, Y. 2009 Report on Present Distribution and Status of Macaques in Vietnam. Laboratory Primate Newsletter 48, 10-14.	peer_rev_pub
31	1	2004	12	2008	1	Vietnam	Tu Mo, Nong Dac To, Kon Tum	14.8058	107.846	point	published	682	Son, V.D., Malaivijitnond, S., Gotoh, S., Tri, C.Q., Hung, N.V., Hoang, L.V., Trang, T.C. & Hamada, Y. 2009 Report on Present Distribution and Status of Macaques in Vietnam. Laboratory Primate Newsletter 48, 10-14.	peer_rev_pub
32	1	2004	12	2008	1	Vietnam	Dak Tong, Dac To, Kon Tum	14.7238	107.773	point	published	682	Son, V.D., Malaivijitnond, S., Gotoh, S., Tri, C.Q., Hung, N.V., Hoang, L.V., Trang, T.C. & Hamada, Y. 2009 Report on Present Distribution and Status of Macaques in Vietnam. Laboratory Primate Newsletter 48, 10-14.	peer_rev_pub
33	1	2004	12	2008	1	Vietnam	Dak Glei, Kon Tum	14.9691	107.785	point	published	682	Son, V.D., Malaivijitnond, S., Gotoh, S., Tri, C.Q., Hung, N.V., Hoang, L.V., Trang, T.C. & Hamada, Y. 2009 Report on Present Distribution and Status of Macaques in Vietnam. Laboratory Primate Newsletter 48, 10-14.	peer_rev_pub
34	1	2004	12	2008	1	Vietnam	Duc Duc, Ngoc Hoi, Kon Tum	14.8271	107.69	point	published	682	Son, V.D., Malaivijitnond, S., Gotoh, S., Tri, C.Q., Hung, N.V., Hoang, L.V., Trang, T.C. & Hamada, Y. 2009 Report on Present Distribution and Status of Macaques in Vietnam. Laboratory Primate Newsletter 48, 10-14.	peer_rev_pub
35	1	2004	12	2008	1	Vietnam	Kon Ko Tu, Kon Tum	14.5239	108.253	point	published	682	Son, V.D., Malaivijitnond, S., Gotoh, S., Tri, C.Q., Hung, N.V., Hoang, L.V., Trang, T.C. & Hamada, Y. 2009 Report on Present Distribution and Status of Macaques in Vietnam. Laboratory Primate Newsletter 48, 10-14.	peer_rev_pub
36	1	2004	12	2008	1	Vietnam	Chu Mo Ray National Park, Kon Tum	14.4225	107.792	point	published	682	Son, V.D., Malaivijitnond, S., Gotoh, S., Tri, C.Q., Hung, N.V., Hoang, L.V., Trang, T.C. & Hamada, Y. 2009 Report on Present Distribution and Status of Macaques in Vietnam. Laboratory Primate Newsletter 48, 10-14.	peer_rev_pub
37	1	2004	12	2008	1	Vietnam	Dak Tore, Kon Ray, Kon Tum	14.4332	108.016	point	published	682	Son, V.D., Malaivijitnond, S., Gotoh, S., Tri, C.Q., Hung, N.V., Hoang, L.V., Trang, T.C. & Hamada, Y. 2009 Report on Present Distribution and Status of Macaques in Vietnam. Laboratory Primate Newsletter 48, 10-14.	peer_rev_pub
38	1	2004	12	2008	1	Vietnam	Xa Kon Dao, Dac To, Kon Tum	14.7843	107.847	point	published	682	Son, V.D., Malaivijitnond, S., Gotoh, S., Tri, C.Q., Hung, N.V., Hoang, L.V., Trang, T.C. & Hamada, Y. 2009 Report on Present Distribution and Status of Macaques in Vietnam. Laboratory Primate Newsletter 48, 10-14.	peer_rev_pub
39	1	2004	12	2008	1	Vietnam	Thon 3, Sa Son, Sa Thay, Kon Tum	14.4157	107.765	point	published	682	Son, V.D., Malaivijitnond, S., Gotoh, S., Tri, C.Q., Hung, N.V., Hoang, L.V., Trang, T.C. & Hamada, Y. 2009 Report on Present Distribution and Status of Macaques in Vietnam. Laboratory Primate Newsletter 48, 10-14.	peer_rev_pub
40	1	2004	12	2008	1	Vietnam	Thon 7, Sa Son, Sa Thay, Kon Tum	14.4163	107.751	point	published	682	Son, V.D., Malaivijitnond, S., Gotoh, S., Tri, C.Q., Hung, N.V., Hoang, L.V., Trang, T.C. & Hamada, Y. 2009 Report on Present Distribution and Status of Macaques in Vietnam. Laboratory Primate Newsletter 48, 10-14.	peer_rev_pub
41	1	2004	12	2008	1	Vietnam	Bargok, Sa Thay, Kon Tum	14.4223	107.73	point	published	682	Son, V.D., Malaivijitnond, S., Gotoh, S., Tri, C.Q., Hung, N.V., Hoang, L.V., Trang, T.C. & Hamada, Y. 2009 Report on Present Distribution and Status of Macaques in Vietnam. Laboratory Primate Newsletter 48, 10-14.	peer_rev_pub
42	1	2004	12	2008	1	Vietnam	Ialy, Chu Pa, Gia Lai	14.1999	107.842	point	published	682	Son, V.D., Malaivijitnond, S., Gotoh, S., Tri, C.Q., Hung, N.V., Hoang, L.V., Trang, T.C. & Hamada, Y. 2009 Report on Present Distribution and Status of Macaques in Vietnam. Laboratory Primate Newsletter 48, 10-14.	peer_rev_pub
43	1	2004	12	2008	1	Vietnam	Play Ken Ngo, Nghia Hoa, Chu Pa, Gia Lai	14.0981	107.923	point	published	682	Son, V.D., Malaivijitnond, S., Gotoh, S., Tri, C.Q., Hung, N.V., Hoang, L.V., Trang, T.C. & Hamada, Y. 2009 Report on Present Distribution and Status of Macaques in Vietnam. Laboratory Primate Newsletter 48, 10-14.	peer_rev_pub
44	1	2004	12	2008	1	Vietnam	Dong Xanh Park, Pleiku	13.98	108.083	point	published	682	Son, V.D., Malaivijitnond, S., Gotoh, S., Tri, C.Q., Hung, N.V., Hoang, L.V., Trang, T.C. & Hamada, Y. 2009 Report on Present Distribution and Status of Macaques in Vietnam. Laboratory Primate Newsletter 48, 10-14.	peer_rev_pub
45	1	2004	12	2008	1	Vietnam	Ank Ke Water Park, Dak Lak	13.95	108.65	point	published	682	Son, V.D., Malaivijitnond, S., Gotoh, S., Tri, C.Q., Hung, N.V., Hoang, L.V., Trang, T.C. & Hamada, Y. 2009 Report on Present Distribution and Status of Macaques in Vietnam. Laboratory Primate Newsletter 48, 10-14.	peer_rev_pub
46	1	2004	12	2008	1	Vietnam	Chu Pha Forest, Ea H’leo, Dak Lak	13.4	108.083	point	published	682	Son, V.D., Malaivijitnond, S., Gotoh, S., Tri, C.Q., Hung, N.V., Hoang, L.V., Trang, T.C. & Hamada, Y. 2009 Report on Present Distribution and Status of Macaques in Vietnam. Laboratory Primate Newsletter 48, 10-14.	peer_rev_pub
47	1	2004	12	2008	1	Vietnam	Ea H’leo, Dak Lak	13.1833	108.2	point	published	682	Son, V.D., Malaivijitnond, S., Gotoh, S., Tri, C.Q., Hung, N.V., Hoang, L.V., Trang, T.C. & Hamada, Y. 2009 Report on Present Distribution and Status of Macaques in Vietnam. Laboratory Primate Newsletter 48, 10-14.	peer_rev_pub
48	1	2004	12	2008	1	Vietnam	Nong Truong 715, Ia Krai, Ia Grai, Gia Lai	13.9597	107.635	point	published	682	Son, V.D., Malaivijitnond, S., Gotoh, S., Tri, C.Q., Hung, N.V., Hoang, L.V., Trang, T.C. & Hamada, Y. 2009 Report on Present Distribution and Status of Macaques in Vietnam. Laboratory Primate Newsletter 48, 10-14.	peer_rev_pub
49	1	2004	12	2008	1	Vietnam	Ia Krieng, Duc Co, Gia Lai	13.5353	107.722	point	published	682	Son, V.D., Malaivijitnond, S., Gotoh, S., Tri, C.Q., Hung, N.V., Hoang, L.V., Trang, T.C. & Hamada, Y. 2009 Report on Present Distribution and Status of Macaques in Vietnam. Laboratory Primate Newsletter 48, 10-14.	peer_rev_pub
50	1	2004	12	2008	1	Vietnam	Khoi 9, Chu Ty, Duc Co, Gia Lai	13.7231	107.704	point	published	682	Son, V.D., Malaivijitnond, S., Gotoh, S., Tri, C.Q., Hung, N.V., Hoang, L.V., Trang, T.C. & Hamada, Y. 2009 Report on Present Distribution and Status of Macaques in Vietnam. Laboratory Primate Newsletter 48, 10-14.	peer_rev_pub
51	1	2004	12	2008	1	Vietnam	Khoi 6, Chu Ty, Duc Co, Gia Lai	13.7861	107.701	point	published	682	Son, V.D., Malaivijitnond, S., Gotoh, S., Tri, C.Q., Hung, N.V., Hoang, L.V., Trang, T.C. & Hamada, Y. 2009 Report on Present Distribution and Status of Macaques in Vietnam. Laboratory Primate Newsletter 48, 10-14.	peer_rev_pub
52	1	2004	12	2008	1	Vietnam	Thon 4, Ia Dom, Duc Co, Gia Lai	13.7753	107.593	point	published	682	Son, V.D., Malaivijitnond, S., Gotoh, S., Tri, C.Q., Hung, N.V., Hoang, L.V., Trang, T.C. & Hamada, Y. 2009 Report on Present Distribution and Status of Macaques in Vietnam. Laboratory Primate Newsletter 48, 10-14.	peer_rev_pub
53	1	2004	12	2008	1	Vietnam	Chu Prong, Gia Lai	13.7535	107.896	point	published	682	Son, V.D., Malaivijitnond, S., Gotoh, S., Tri, C.Q., Hung, N.V., Hoang, L.V., Trang, T.C. & Hamada, Y. 2009 Report on Present Distribution and Status of Macaques in Vietnam. Laboratory Primate Newsletter 48, 10-14.	peer_rev_pub
54	1	2004	12	2008	1	Vietnam	To Nao, Ea Pong, Chu Prong, Gia Lai	13.6762	107.805	point	published	682	Son, V.D., Malaivijitnond, S., Gotoh, S., Tri, C.Q., Hung, N.V., Hoang, L.V., Trang, T.C. & Hamada, Y. 2009 Report on Present Distribution and Status of Macaques in Vietnam. Laboratory Primate Newsletter 48, 10-14.	peer_rev_pub
55	1	2004	12	2008	1	Vietnam	Chu Prong, Gia Lai	13.7529	107.959	point	published	682	Son, V.D., Malaivijitnond, S., Gotoh, S., Tri, C.Q., Hung, N.V., Hoang, L.V., Trang, T.C. & Hamada, Y. 2009 Report on Present Distribution and Status of Macaques in Vietnam. Laboratory Primate Newsletter 48, 10-14.	peer_rev_pub
56	1	2004	12	2008	1	Vietnam	Ia Pho, Chu Prong, Gia Lai	13.8002	107.941	point	published	682	Son, V.D., Malaivijitnond, S., Gotoh, S., Tri, C.Q., Hung, N.V., Hoang, L.V., Trang, T.C. & Hamada, Y. 2009 Report on Present Distribution and Status of Macaques in Vietnam. Laboratory Primate Newsletter 48, 10-14.	peer_rev_pub
57	1	2004	12	2008	1	Vietnam	Ia Mua, Bau Can, Chu Prong, Gia Lai	13.8338	107.939	point	published	682	Son, V.D., Malaivijitnond, S., Gotoh, S., Tri, C.Q., Hung, N.V., Hoang, L.V., Trang, T.C. & Hamada, Y. 2009 Report on Present Distribution and Status of Macaques in Vietnam. Laboratory Primate Newsletter 48, 10-14.	peer_rev_pub
58	1	2004	12	2008	1	Vietnam	786 Hung Vuong, Chu Se, Gia Lai	13.6969	108.075	point	published	682	Son, V.D., Malaivijitnond, S., Gotoh, S., Tri, C.Q., Hung, N.V., Hoang, L.V., Trang, T.C. & Hamada, Y. 2009 Report on Present Distribution and Status of Macaques in Vietnam. Laboratory Primate Newsletter 48, 10-14.	peer_rev_pub
59	1	2004	12	2008	1	Vietnam	Thi Tran, Chu Se, Gia Lai	13.7163	108.068	point	published	682	Son, V.D., Malaivijitnond, S., Gotoh, S., Tri, C.Q., Hung, N.V., Hoang, L.V., Trang, T.C. & Hamada, Y. 2009 Report on Present Distribution and Status of Macaques in Vietnam. Laboratory Primate Newsletter 48, 10-14.	peer_rev_pub
60	1	2004	12	2008	1	Vietnam	Ia Lop, Chu Se, Gia Lai	13.6956	108.028	point	published	682	Son, V.D., Malaivijitnond, S., Gotoh, S., Tri, C.Q., Hung, N.V., Hoang, L.V., Trang, T.C. & Hamada, Y. 2009 Report on Present Distribution and Status of Macaques in Vietnam. Laboratory Primate Newsletter 48, 10-14.	peer_rev_pub
61	1	2004	12	2008	1	Vietnam	Thon 1, Ia Lop, Chu Se, Gia Lai	13.6982	108.026	point	published	682	Son, V.D., Malaivijitnond, S., Gotoh, S., Tri, C.Q., Hung, N.V., Hoang, L.V., Trang, T.C. & Hamada, Y. 2009 Report on Present Distribution and Status of Macaques in Vietnam. Laboratory Primate Newsletter 48, 10-14.	peer_rev_pub
62	1	2004	12	2008	1	Vietnam	Thon 4, Ia Le, Chu Se, Gia Lai	13.4647	108.095	point	published	682	Son, V.D., Malaivijitnond, S., Gotoh, S., Tri, C.Q., Hung, N.V., Hoang, L.V., Trang, T.C. & Hamada, Y. 2009 Report on Present Distribution and Status of Macaques in Vietnam. Laboratory Primate Newsletter 48, 10-14.	peer_rev_pub
63	1	2004	12	2008	1	Vietnam	Khoi 16, Buon Ho, Dak Lak	12.8971	108.262	point	published	682	Son, V.D., Malaivijitnond, S., Gotoh, S., Tri, C.Q., Hung, N.V., Hoang, L.V., Trang, T.C. & Hamada, Y. 2009 Report on Present Distribution and Status of Macaques in Vietnam. Laboratory Primate Newsletter 48, 10-14.	peer_rev_pub
64	1	2004	12	2008	1	Vietnam	Thon 11, Hoa Phu, Dak Lak	12.6009	107.949	point	published	682	Son, V.D., Malaivijitnond, S., Gotoh, S., Tri, C.Q., Hung, N.V., Hoang, L.V., Trang, T.C. & Hamada, Y. 2009 Report on Present Distribution and Status of Macaques in Vietnam. Laboratory Primate Newsletter 48, 10-14.	peer_rev_pub
66	1	2004	12	2008	1	Vietnam	Buon Siho, Buon Don, Dak Lak	13.3973	107.795	point	published	682	Son, V.D., Malaivijitnond, S., Gotoh, S., Tri, C.Q., Hung, N.V., Hoang, L.V., Trang, T.C. & Hamada, Y. 2009 Report on Present Distribution and Status of Macaques in Vietnam. Laboratory Primate Newsletter 48, 10-14.	peer_rev_pub
67	1	2004	12	2008	1	Vietnam	Ban Don, Buon Don, Dak Lak	12.8836	107.781	point	published	682	Son, V.D., Malaivijitnond, S., Gotoh, S., Tri, C.Q., Hung, N.V., Hoang, L.V., Trang, T.C. & Hamada, Y. 2009 Report on Present Distribution and Status of Macaques in Vietnam. Laboratory Primate Newsletter 48, 10-14.	peer_rev_pub
69	1	2004	12	2008	1	Vietnam	Yok Don National Park, Dak Lak	12.8667	107.8	point	published	682	Son, V.D., Malaivijitnond, S., Gotoh, S., Tri, C.Q., Hung, N.V., Hoang, L.V., Trang, T.C. & Hamada, Y. 2009 Report on Present Distribution and Status of Macaques in Vietnam. Laboratory Primate Newsletter 48, 10-14.	peer_rev_pub
70	1	2004	12	2008	1	Vietnam	Khanh Duong, M’Drak, Dak Lak	12.75	108.767	point	published	682	Son, V.D., Malaivijitnond, S., Gotoh, S., Tri, C.Q., Hung, N.V., Hoang, L.V., Trang, T.C. & Hamada, Y. 2009 Report on Present Distribution and Status of Macaques in Vietnam. Laboratory Primate Newsletter 48, 10-14.	peer_rev_pub
71	1	2004	12	2008	1	Vietnam	Dak Mil Ranger Station, Dak Nong	12	107.683	point	published	682	Son, V.D., Malaivijitnond, S., Gotoh, S., Tri, C.Q., Hung, N.V., Hoang, L.V., Trang, T.C. & Hamada, Y. 2009 Report on Present Distribution and Status of Macaques in Vietnam. Laboratory Primate Newsletter 48, 10-14.	peer_rev_pub
72	1	2004	12	2008	1	Vietnam	Ea So Natural Reserve, Dak Lak	12.8167	108.483	point	published	682	Son, V.D., Malaivijitnond, S., Gotoh, S., Tri, C.Q., Hung, N.V., Hoang, L.V., Trang, T.C. & Hamada, Y. 2009 Report on Present Distribution and Status of Macaques in Vietnam. Laboratory Primate Newsletter 48, 10-14.	peer_rev_pub
73	1	2004	12	2008	1	Vietnam	Dong Xanh Park, Pleiku	13.98	108.083	point	published	682	Son, V.D., Malaivijitnond, S., Gotoh, S., Tri, C.Q., Hung, N.V., Hoang, L.V., Trang, T.C. & Hamada, Y. 2009 Report on Present Distribution and Status of Macaques in Vietnam. Laboratory Primate Newsletter 48, 10-14.	peer_rev_pub
75	1	2004	12	2008	1	Vietnam	Lak Lake, Lak, Dak Lak	12.4164	108.168	point	published	682	Son, V.D., Malaivijitnond, S., Gotoh, S., Tri, C.Q., Hung, N.V., Hoang, L.V., Trang, T.C. & Hamada, Y. 2009 Report on Present Distribution and Status of Macaques in Vietnam. Laboratory Primate Newsletter 48, 10-14.	peer_rev_pub
76	1	2004	12	2008	1	Vietnam	Krong Pa, Gia Lai	11.8167	108.667	point	published	682	Son, V.D., Malaivijitnond, S., Gotoh, S., Tri, C.Q., Hung, N.V., Hoang, L.V., Trang, T.C. & Hamada, Y. 2009 Report on Present Distribution and Status of Macaques in Vietnam. Laboratory Primate Newsletter 48, 10-14.	peer_rev_pub
77	1	2004	12	2008	1	Vietnam	Ban Don, Buon Don, Dak Lak	12.9149	107.818	point	published	682	Son, V.D., Malaivijitnond, S., Gotoh, S., Tri, C.Q., Hung, N.V., Hoang, L.V., Trang, T.C. & Hamada, Y. 2009 Report on Present Distribution and Status of Macaques in Vietnam. Laboratory Primate Newsletter 48, 10-14.	peer_rev_pub
78	1	2004	12	2008	1	Vietnam	Krong A, Buon Don, Dak Lak	12.8785	107.797	point	published	682	Son, V.D., Malaivijitnond, S., Gotoh, S., Tri, C.Q., Hung, N.V., Hoang, L.V., Trang, T.C. & Hamada, Y. 2009 Report on Present Distribution and Status of Macaques in Vietnam. Laboratory Primate Newsletter 48, 10-14.	peer_rev_pub
79	1	2004	12	2008	1	Vietnam	Ban Don, Buon Don, Dak Lak	12.9026	107.797	point	published	682	Son, V.D., Malaivijitnond, S., Gotoh, S., Tri, C.Q., Hung, N.V., Hoang, L.V., Trang, T.C. & Hamada, Y. 2009 Report on Present Distribution and Status of Macaques in Vietnam. Laboratory Primate Newsletter 48, 10-14.	peer_rev_pub
80	1	2004	12	2008	1	Vietnam	Thon 3, Earal, Ea H’leo, Dak Lak	13.2384	108.185	point	published	682	Son, V.D., Malaivijitnond, S., Gotoh, S., Tri, C.Q., Hung, N.V., Hoang, L.V., Trang, T.C. & Hamada, Y. 2009 Report on Present Distribution and Status of Macaques in Vietnam. Laboratory Primate Newsletter 48, 10-14.	peer_rev_pub
81	1	2004	12	2008	1	Vietnam	Thon 3, Ea H’leo, Dak Lak	13.3499	108.157	point	published	682	Son, V.D., Malaivijitnond, S., Gotoh, S., Tri, C.Q., Hung, N.V., Hoang, L.V., Trang, T.C. & Hamada, Y. 2009 Report on Present Distribution and Status of Macaques in Vietnam. Laboratory Primate Newsletter 48, 10-14.	peer_rev_pub
82	1	2004	12	2008	1	Vietnam	Thon 6, Cu Mlang, Ea Sup, Dak Lak	13.0549	107.858	point	published	682	Son, V.D., Malaivijitnond, S., Gotoh, S., Tri, C.Q., Hung, N.V., Hoang, L.V., Trang, T.C. & Hamada, Y. 2009 Report on Present Distribution and Status of Macaques in Vietnam. Laboratory Primate Newsletter 48, 10-14.	peer_rev_pub
83	1	2004	12	2008	1	Vietnam	Thon 1, Ea Sup, Dak Lak	13.0801	107.881	point	published	682	Son, V.D., Malaivijitnond, S., Gotoh, S., Tri, C.Q., Hung, N.V., Hoang, L.V., Trang, T.C. & Hamada, Y. 2009 Report on Present Distribution and Status of Macaques in Vietnam. Laboratory Primate Newsletter 48, 10-14.	peer_rev_pub
84	1	2004	12	2008	1	Vietnam	Thon 18, Ea Sup, Dak Lak	13.0815	107.891	point	published	682	Son, V.D., Malaivijitnond, S., Gotoh, S., Tri, C.Q., Hung, N.V., Hoang, L.V., Trang, T.C. & Hamada, Y. 2009 Report on Present Distribution and Status of Macaques in Vietnam. Laboratory Primate Newsletter 48, 10-14.	peer_rev_pub
85	1	2004	12	2008	1	Vietnam	Ea Roc, Ea Sup, Dak Lak	13.168	107.811	point	published	682	Son, V.D., Malaivijitnond, S., Gotoh, S., Tri, C.Q., Hung, N.V., Hoang, L.V., Trang, T.C. & Hamada, Y. 2009 Report on Present Distribution and Status of Macaques in Vietnam. Laboratory Primate Newsletter 48, 10-14.	peer_rev_pub
86	1	2004	12	2008	1	Vietnam	Thon 1, Ea Sup, Dak Lak	13.0824	107.881	point	published	682	Son, V.D., Malaivijitnond, S., Gotoh, S., Tri, C.Q., Hung, N.V., Hoang, L.V., Trang, T.C. & Hamada, Y. 2009 Report on Present Distribution and Status of Macaques in Vietnam. Laboratory Primate Newsletter 48, 10-14.	peer_rev_pub
87	1	2004	12	2008	1	Vietnam	Thon 1, Ea Sup, Dak Lak	13.0813	107.881	point	published	682	Son, V.D., Malaivijitnond, S., Gotoh, S., Tri, C.Q., Hung, N.V., Hoang, L.V., Trang, T.C. & Hamada, Y. 2009 Report on Present Distribution and Status of Macaques in Vietnam. Laboratory Primate Newsletter 48, 10-14.	peer_rev_pub
88	1	2004	12	2008	1	Vietnam	Thon 13, Ea Roc, Ea Sup, Dak Lak	13.1682	107.812	point	published	682	Son, V.D., Malaivijitnond, S., Gotoh, S., Tri, C.Q., Hung, N.V., Hoang, L.V., Trang, T.C. & Hamada, Y. 2009 Report on Present Distribution and Status of Macaques in Vietnam. Laboratory Primate Newsletter 48, 10-14.	peer_rev_pub
89	1	2004	12	2008	1	Vietnam	Cu Ne, Krong Buk, Dak Lak	14.4116	108.231	point	published	682	Son, V.D., Malaivijitnond, S., Gotoh, S., Tri, C.Q., Hung, N.V., Hoang, L.V., Trang, T.C. & Hamada, Y. 2009 Report on Present Distribution and Status of Macaques in Vietnam. Laboratory Primate Newsletter 48, 10-14.	peer_rev_pub
90	1	2004	12	2008	1	Vietnam	Duc Trung, Duc Manh, Dak Mil, Dak Nong	12.4518	107.658	point	published	682	Son, V.D., Malaivijitnond, S., Gotoh, S., Tri, C.Q., Hung, N.V., Hoang, L.V., Trang, T.C. & Hamada, Y. 2009 Report on Present Distribution and Status of Macaques in Vietnam. Laboratory Primate Newsletter 48, 10-14.	peer_rev_pub
91	1	2004	12	2008	1	Vietnam	Xuan Loc, Dac Sac, Dak Mil, Dak Nong	12.4223	107.678	point	published	682	Son, V.D., Malaivijitnond, S., Gotoh, S., Tri, C.Q., Hung, N.V., Hoang, L.V., Trang, T.C. & Hamada, Y. 2009 Report on Present Distribution and Status of Macaques in Vietnam. Laboratory Primate Newsletter 48, 10-14.	peer_rev_pub
92	1	2004	12	2008	1	Vietnam	Xuan Loc, Dac Sac, Dak Mil, Dak Nong	12.4215	107.677	point	published	682	Son, V.D., Malaivijitnond, S., Gotoh, S., Tri, C.Q., Hung, N.V., Hoang, L.V., Trang, T.C. & Hamada, Y. 2009 Report on Present Distribution and Status of Macaques in Vietnam. Laboratory Primate Newsletter 48, 10-14.	peer_rev_pub
93	1	2004	12	2008	1	Vietnam	Minh Doai, Duc Minh, Dak Mil, Dak Nong	12.4348	107.632	point	published	682	Son, V.D., Malaivijitnond, S., Gotoh, S., Tri, C.Q., Hung, N.V., Hoang, L.V., Trang, T.C. & Hamada, Y. 2009 Report on Present Distribution and Status of Macaques in Vietnam. Laboratory Primate Newsletter 48, 10-14.	peer_rev_pub
94	1	2004	12	2008	1	Vietnam	Da Lat, Lam Dong	11.9333	107.45	point	published	682	Son, V.D., Malaivijitnond, S., Gotoh, S., Tri, C.Q., Hung, N.V., Hoang, L.V., Trang, T.C. & Hamada, Y. 2009 Report on Present Distribution and Status of Macaques in Vietnam. Laboratory Primate Newsletter 48, 10-14.	peer_rev_pub
95	1	2004	12	2008	1	Vietnam	Krong Pa Forest Protection, Gia Lai	11.9333	107.45	point	published	682	Son, V.D., Malaivijitnond, S., Gotoh, S., Tri, C.Q., Hung, N.V., Hoang, L.V., Trang, T.C. & Hamada, Y. 2009 Report on Present Distribution and Status of Macaques in Vietnam. Laboratory Primate Newsletter 48, 10-14.	peer_rev_pub
96	1	2004	12	2008	1	Vietnam	Dam Bri Park, Lam Dong	11.3667	106.167	point	published	682	Son, V.D., Malaivijitnond, S., Gotoh, S., Tri, C.Q., Hung, N.V., Hoang, L.V., Trang, T.C. & Hamada, Y. 2009 Report on Present Distribution and Status of Macaques in Vietnam. Laboratory Primate Newsletter 48, 10-14.	peer_rev_pub
97	1	2004	12	2008	1	Vietnam	Ba Den Mountain, Tay Ninh	11.8167	108.667	point	published	682	Son, V.D., Malaivijitnond, S., Gotoh, S., Tri, C.Q., Hung, N.V., Hoang, L.V., Trang, T.C. & Hamada, Y. 2009 Report on Present Distribution and Status of Macaques in Vietnam. Laboratory Primate Newsletter 48, 10-14.	peer_rev_pub
98	1	2004	12	2008	1	Vietnam	Lo Go Sa Mat National Park, Tay Ninh	11.0333	105.95	point	published	682	Son, V.D., Malaivijitnond, S., Gotoh, S., Tri, C.Q., Hung, N.V., Hoang, L.V., Trang, T.C. & Hamada, Y. 2009 Report on Present Distribution and Status of Macaques in Vietnam. Laboratory Primate Newsletter 48, 10-14.	peer_rev_pub
152	1	2011	8	2011	1	Cambodia	Location 1, Oddar Meanchey, Kulen-Promptep Wildife Sanctuary, Trapeang Prasat & Anlong Veng Districts	14.0675	104.196	point	published	775	Son, V.D., Malaivijitnond, S., Gotoh, S., Tri, C.Q., Hung, N.V., Hoang, L.V., Trang, T.C. & Hamada, Y. 2009 Report on Present Distribution and Status of Macaques in Vietnam. Laboratory Primate Newsletter 48, 10-14.	peer_rev_pub
153	1	2011	8	2011	1	Cambodia	Location 2, Oddar Meanchey, Kulen-Promptep Wildife Sanctuary, Trapeang Prasat & Anlong Veng Districts	14.0514	104.192	point	published	775	Son, V.D., Malaivijitnond, S., Gotoh, S., Tri, C.Q., Hung, N.V., Hoang, L.V., Trang, T.C. & Hamada, Y. 2009 Report on Present Distribution and Status of Macaques in Vietnam. Laboratory Primate Newsletter 48, 10-14.	peer_rev_pub
154	1	2011	8	2011	1	Cambodia	Location 3, Oddar Meanchey, Kulen-Promptep Wildife Sanctuary, Trapeang Prasat & Anlong Veng Districts	14.0722	104.153	point	published	775	Son, V.D., Malaivijitnond, S., Gotoh, S., Tri, C.Q., Hung, N.V., Hoang, L.V., Trang, T.C. & Hamada, Y. 2009 Report on Present Distribution and Status of Macaques in Vietnam. Laboratory Primate Newsletter 48, 10-14.	peer_rev_pub
155	1	2011	8	2011	1	Cambodia	Location 4, Oddar Meanchey, Kulen-Promptep Wildife Sanctuary, Trapeang Prasat & Anlong Veng Districts	14.0665	104.151	point	published	775	Son, V.D., Malaivijitnond, S., Gotoh, S., Tri, C.Q., Hung, N.V., Hoang, L.V., Trang, T.C. & Hamada, Y. 2009 Report on Present Distribution and Status of Macaques in Vietnam. Laboratory Primate Newsletter 48, 10-14.	peer_rev_pub
197	12	2002	12	2002	1	Cambodia	Cardamom Mountain Area	11.612	103.349	point	published	1247	Global Biodiversity Information Facility; http://www.gbif.org/	published_dataset
398	7	2003	1	2006	1	Cambodia	Chhlong	12.1978	106.125	point	published	783	Gray, T.N.E., Rattanak, O., Keavuth, H., Chanrattana, P. & Maxwell, A.L. 2012 The status of large mammals in eastern Cambodia: a review of camera trapping data 1999-2007. Cambodian Journal of Natural History 1, 42-55.	peer_rev_pub
399	11	2001	3	2007	1	Cambodia	Phnom Prich Wildlife Sanctuary	12.7234	106.705	point	published	783	Gray, T.N.E., Rattanak, O., Keavuth, H., Chanrattana, P. & Maxwell, A.L. 2012 The status of large mammals in eastern Cambodia: a review of camera trapping data 1999-2007. Cambodian Journal of Natural History 1, 42-55.	peer_rev_pub
400	11	2003	5	2006	1	Cambodia	Prey Khieu	13.2881	106.501	point	published	783	Gray, T.N.E., Rattanak, O., Keavuth, H., Chanrattana, P. & Maxwell, A.L. 2012 The status of large mammals in eastern Cambodia: a review of camera trapping data 1999-2007. Cambodian Journal of Natural History 1, 42-55.	peer_rev_pub
401	4	2002	3	2006	1	Cambodia	Prey Long	13.2934	105.672	point	published	783	Gray, T.N.E., Rattanak, O., Keavuth, H., Chanrattana, P. & Maxwell, A.L. 2012 The status of large mammals in eastern Cambodia: a review of camera trapping data 1999-2007. Cambodian Journal of Natural History 1, 42-55.	peer_rev_pub
402	11	2004	11	2007	1	Cambodia	Mondulkiri Protected Forest	13.0046	107.427	point	published	783	Gray, T.N.E., Rattanak, O., Keavuth, H., Chanrattana, P. & Maxwell, A.L. 2012 The status of large mammals in eastern Cambodia: a review of camera trapping data 1999-2007. Cambodian Journal of Natural History 1, 42-55.	peer_rev_pub
403	6	1999	8	2001	1	Cambodia	Virachey National Park	14.2138	107.117	point	published	783	Gray, T.N.E., Rattanak, O., Keavuth, H., Chanrattana, P. & Maxwell, A.L. 2012 The status of large mammals in eastern Cambodia: a review of camera trapping data 1999-2007. Cambodian Journal of Natural History 1, 42-55.	peer_rev_pub
256					1	India	Trishna Wildlife Sanctuary, (TWS) Tripura	23.2795	91.4017	point	published	368	Gupta, A.K., Dasgupta, S. & Sankar, K. 2004 Are the densities of primates in different fragments sufficient for long-term survival? A status survey of primates in Trishna Wildlife Sanctuary, Tripura, India. Folia Primatol. (Basel). 75, 269-269.	peer_rev_pub
135	9	2002	3	2004	1	Thailand	What Tham Kham, Tambon Rai, Amphoe Panna Nikhom, Sakhon Nakhorn Province	17.2187	103.903	point	published	474	Hamada, Y., Ohsawa, H., Urasopon, N. & Malaivijitnond, S. 2004 Preliminary report on the distribution and status of macaques in Thailand. Primate Research 20, 97-108.	peer_rev_pub
136	9	2002	3	2004	1	Thailand	Khao Yai National Park, Amphoe Pak Chong, Nakhonratchasima Province	14.4	101.5	point	published	474	Hamada, Y., Ohsawa, H., Urasopon, N. & Malaivijitnond, S. 2004 Preliminary report on the distribution and status of macaques in Thailand. Primate Research 20, 97-108.	peer_rev_pub	374	Malaivijitnond, S., Hamada, Y., Varavudhi, P. & Takenaka, O. 2005 The current distribution and status of macaques in Thailand. Nat Hist J Chula Univ Suppl 1, 35-45.	peer_rev_pub
263	2	2003	2	2003	1	Thailand	Wat Tham Pa Mak Ho Temple, Wang Saphun district, Loei Province	17.2333	101.783	point	published	1022	Hamada, Y., Urasopon, N., Hadi, I. & Malaivijitnond, S. 2006 Body size and proportions and pelage color of free-ranging Macaca mulatta from a zone of hybridization in northeastern Thailand. Int. J. Primatol. 27, 497-513. (doi:10.1007/s10764-006-9033-4).	peer_rev_pub
10	5	2006	5	2006	1	Lao PDR	Ngay Nua	21.84	101.9	wide area	published	475	Hamada, Y., Malaivijitnond, S., Kingsada, P. & Bounnam, P. 2007 The distribution and present status of primates in the northern region of Lao PDR. Nat. Hist. J. Chulalongkorn Univ 7, 161-191.	peer_rev_pub
11	5	2006	5	2006	1	Lao PDR	Namkang mai	21.09	101.08	wide area	published	475	Hamada, Y., Malaivijitnond, S., Kingsada, P. & Bounnam, P. 2007 The distribution and present status of primates in the northern region of Lao PDR. Nat. Hist. J. Chulalongkorn Univ 7, 161-191.	peer_rev_pub
12	5	2006	5	2006	1	Lao PDR	Nam Ma	21.02	101.04	wide area	published	475	Hamada, Y., Malaivijitnond, S., Kingsada, P. & Bounnam, P. 2007 The distribution and present status of primates in the northern region of Lao PDR. Nat. Hist. J. Chulalongkorn Univ 7, 161-191.	peer_rev_pub
13	5	2006	5	2006	1	Lao PDR	Pak Mong	20.58	102.41	wide area	published	475	Hamada, Y., Malaivijitnond, S., Kingsada, P. & Bounnam, P. 2007 The distribution and present status of primates in the northern region of Lao PDR. Nat. Hist. J. Chulalongkorn Univ 7, 161-191.	peer_rev_pub
14	5	2006	5	2006	1	Lao PDR	Soblab	20.05	103.61	wide area	published	475	Hamada, Y., Malaivijitnond, S., Kingsada, P. & Bounnam, P. 2007 The distribution and present status of primates in the northern region of Lao PDR. Nat. Hist. J. Chulalongkorn Univ 7, 161-191.	peer_rev_pub
15	5	2006	5	2006	1	Lao PDR	Khang Khao	20.17	103.82	wide area	published	475	Hamada, Y., Malaivijitnond, S., Kingsada, P. & Bounnam, P. 2007 The distribution and present status of primates in the northern region of Lao PDR. Nat. Hist. J. Chulalongkorn Univ 7, 161-191.	peer_rev_pub
16	5	2006	5	2006	1	Lao PDR	Na Keng	20.18	103.93	wide area	published	475	Hamada, Y., Malaivijitnond, S., Kingsada, P. & Bounnam, P. 2007 The distribution and present status of primates in the northern region of Lao PDR. Nat. Hist. J. Chulalongkorn Univ 7, 161-191.	peer_rev_pub
396	1	1996	9	1996	1	Vietnam	Na Hang	22.5075	105.373	point	published	781	Hill, M. 1999 Primates in protected areas of northern Vietnam. Natural History Bulletin of Siam Society 47, 63-76.	peer_rev_pub
397	4	1995	6	1995	1	Vietnam	Pu Huong	19.2947	104.936	point	published	781	Hill, M. 1999 Primates in protected areas of northern Vietnam. Natural History Bulletin of Siam Society 47, 63-76.	peer_rev_pub
415	5	2005	7	2014	1	Thailand	Phu Khieo Wildlife Sanctuary	16.3358	101.607	polygon	published	1255	Verhaltensökologie; http://www.uni-goettingen.de/de/pkws-home-to-four-species-of-macaques/355405.html; accessed 14.07.2014	website
144	10	2004	10	2004	1	Thailand	Wat Tham Kham, Sakon Nakhon	17.2167	103.9	point	published	756	Malaivijitnond, S., Arsaithamkul, V., Tanaka, H., Pomchote, P., Jaroenporn, S., Suryobroto, B. & Hamada, Y. 2012 Boundary zone between northern and southern pig-tailed macaques and their morphological differences. Primates 53, 377-389. (doi:10.1007/s10329-012-0316-4).	peer_rev_pub
145	8	2007	8	2007	1	Thailand	Phu Khieow Wildlife Sanctuary, Chaiyaphum	16.45	101.65	point	published	756	Malaivijitnond, S., Arsaithamkul, V., Tanaka, H., Pomchote, P., Jaroenporn, S., Suryobroto, B. & Hamada, Y. 2012 Boundary zone between northern and southern pig-tailed macaques and their morphological differences. Primates 53, 377-389. (doi:10.1007/s10329-012-0316-4).	peer_rev_pub
146	3	2008	3	2008	1	Thailand	Erawan Monastary, Lop Buri	14.7833	100.867	point	published	756	Malaivijitnond, S., Arsaithamkul, V., Tanaka, H., Pomchote, P., Jaroenporn, S., Suryobroto, B. & Hamada, Y. 2012 Boundary zone between northern and southern pig-tailed macaques and their morphological differences. Primates 53, 377-389. (doi:10.1007/s10329-012-0316-4).	peer_rev_pub
147	8	2003	8	2003	1	Thailand	Khao Yai National Park, Nakhon Ratchasima	14.4	101.5	point	published	756	Malaivijitnond, S., Arsaithamkul, V., Tanaka, H., Pomchote, P., Jaroenporn, S., Suryobroto, B. & Hamada, Y. 2012 Boundary zone between northern and southern pig-tailed macaques and their morphological differences. Primates 53, 377-389. (doi:10.1007/s10329-012-0316-4).	peer_rev_pub
148	3	2005	3	2005	1	Thailand	Khao Chi-on Non-hunting area, Chonburi	12.7693	100.97	point	published	756	Malaivijitnond, S., Arsaithamkul, V., Tanaka, H., Pomchote, P., Jaroenporn, S., Suryobroto, B. & Hamada, Y. 2012 Boundary zone between northern and southern pig-tailed macaques and their morphological differences. Primates 53, 377-389. (doi:10.1007/s10329-012-0316-4).	peer_rev_pub	374	Malaivijitnond, S., Hamada, Y., Varavudhi, P. & Takenaka, O. 2005 The current distribution and status of macaques in Thailand. Nat Hist J Chula Univ Suppl 1, 35-45.	peer_rev_pub
149	9	2008	9	2008	1	Thailand	Piew Waterfall Natinoal Park, Chanthaburi	12.5167	102.167	point	published	756	Malaivijitnond, S., Arsaithamkul, V., Tanaka, H., Pomchote, P., Jaroenporn, S., Suryobroto, B. & Hamada, Y. 2012 Boundary zone between northern and southern pig-tailed macaques and their morphological differences. Primates 53, 377-389. (doi:10.1007/s10329-012-0316-4).	peer_rev_pub
150	7	2005	7	2005	1	Thailand	Wat Tham Prutakhian, Chumphon	10.8343	99.2606	point	published	756	Malaivijitnond, S., Arsaithamkul, V., Tanaka, H., Pomchote, P., Jaroenporn, S., Suryobroto, B. & Hamada, Y. 2012 Boundary zone between northern and southern pig-tailed macaques and their morphological differences. Primates 53, 377-389. (doi:10.1007/s10329-012-0316-4).	peer_rev_pub	374	Malaivijitnond, S., Hamada, Y., Varavudhi, P. & Takenaka, O. 2005 The current distribution and status of macaques in Thailand. Nat Hist J Chula Univ Suppl 1, 35-45.	peer_rev_pub
5					1	Thailand	Wat Thanm Kham, Tambon Rai, Amphoe Panna Nikhom, Sakhon Nakhon Province	17.2187	103.901	point	published	374	Malaivijitnond, S., Hamada, Y., Varavudhi, P. & Takenaka, O. 2005 The current distribution and status of macaques in Thailand. Nat Hist J Chula Univ Suppl 1, 35-45.	peer_rev_pub
8		2005		2006	1	Thailand	Wat Tham Khao Marong, Ban Marong, Tambon Pongprasart, Amphoe Bangsaphan Yai, Prachuab Khirikhan Province	11.2024	99.4977	point	published	374	Malaivijitnond, S., Hamada, Y., Varavudhi, P. & Takenaka, O. 2005 The current distribution and status of macaques in Thailand. Nat Hist J Chula Univ Suppl 1, 35-45.	peer_rev_pub
422	1	2012	7	2014	1	Myanmar	Hukaung Valley Wildlife Santuary	26.5126	96.5373	polygon	published	1256	Myanmar Biodiversity; http://myanmarbiodiversity.org/high_priority_kbas.php?view=Hukaung%20Valley%20W.S & http://myanmarbiodiversity.org/high_priority_kbas.php?view=Hukaung%20Valley%20W.S%20(Extension); Date accessed: 23/07/2014	website
423	1	2012	7	2014	1	Myanmar	Indawgyi W.S	25.098	96.3378	polygon	published	1256	Myanmar Biodiversity; http://myanmarbiodiversity.org/high_priority_kbas.php?view=Indawgyi%20W.S; Date accessed: 23/07/2014	website
424	1	2012	7	2014	1	Myanmar	Rakhine Yoma Elephant Range	18.0086	94.7667	polygon	published	1256	Myanmar Biodiversity; http://myanmarbiodiversity.org/high_priority_kbas.php?view=Rakhine%20Yoma%20Elephant%20Range; Date accessed: 23/07/2014	website
425	1	2012	7	2014	1	Myanmar	Central Bago Yoma	18.3207	96.1567	polygon	published	1256	Myanmar Biodiversity; http://myanmarbiodiversity.org/medium_priority_kbas.php?view=Central%20Bago%20Yoma; Date accessed: 23/07/2014	website
426	1	2012	7	2014	1	Myanmar	North Zarmayi Elephant P.A	18.1419	96.0512	polygon	published	1256	Myanmar Biodiversity; http://myanmarbiodiversity.org/medium_priority_kbas.php?view=North%20Zarmayi%20Elephant%20P.A; Date accessed: 23/07/2014	website
427	1	2012	7	2014	1	Myanmar	North Zarmayi	18.3438	96.0547	polygon	published	1256	Myanmar Biodiversity; http://myanmarbiodiversity.org/more_info_needed_kbas.php?view=North%20Zarmayi; Date accessed: 23/07/2014	website
428	1	2012	7	2014	1	Myanmar	Northern Rakhine Yoma	21.209	92.4204	polygon	published	1256	Myanmar Biodiversity; http://myanmarbiodiversity.org/more_info_needed_kbas.php?view=Northern%20Rakhine%20Yoma; Date accessed: 23/07/2014	website
429	1	2012	7	2014	1	Myanmar	Panlaung Pyadalin Cave W.S	21.0336	96.3591	polygon	published	1256	Myanmar Biodiversity; http://myanmarbiodiversity.org/more_info_needed_kbas.php?view=Panlaung%20Pyadalin%20Cave%20W.S; Date accessed: 23/07/2014	website
412		2008		2009	1	Thailand	Chiange Mai	18.792	98.9703	polygon	published	1068	Nakgoi, K., Nitatpattana, N., Wajjwalku, W., Pongsopawijit, P., Kaewchot, S., Yoksan, S., Siripolwat, V., Souris, M. & Gonzalez, J.-P. 2014 Dengue, Japanese encephalitis and Chikungunya virus antibody prevalence among captive monkey (Macaca nemestrina) colonies of Northern Thailand. Am. J. Primatol. 76, 97-102.	peer_rev_pub
413		2008		2009	1	Thailand	Chiang Rai	19.8943	99.7814	polygon	published	1068	Nakgoi, K., Nitatpattana, N., Wajjwalku, W., Pongsopawijit, P., Kaewchot, S., Yoksan, S., Siripolwat, V., Souris, M. & Gonzalez, J.-P. 2014 Dengue, Japanese encephalitis and Chikungunya virus antibody prevalence among captive monkey (Macaca nemestrina) colonies of Northern Thailand. Am. J. Primatol. 76, 97-102.	peer_rev_pub
414		2008		2009	1	Thailand	Mae Hong Son	19.2762	98.0184	polygon	published	1068	Nakgoi, K., Nitatpattana, N., Wajjwalku, W., Pongsopawijit, P., Kaewchot, S., Yoksan, S., Siripolwat, V., Souris, M. & Gonzalez, J.-P. 2014 Dengue, Japanese encephalitis and Chikungunya virus antibody prevalence among captive monkey (Macaca nemestrina) colonies of Northern Thailand. Am. J. Primatol. 76, 97-102.	peer_rev_pub
194	1	2008	8	2008	1	Thailand	Mo-Singto permanent forest dynamics plot, Khao Yai National Park, Nakhon Nayok Province	14.433	101.367	point	published	761	Pierce, A.J. & Pobprasert, K. 2013 Nest predators of southeast Asian evergreen forest birds identified through continuous video recording. Ibis 155, 419-423.	peer_rev_pub
394	3	1994	3	1994	1	Myanmar	Tamanthi Wildlife Sanctuary, Upper Chindwin District	25.4209	95.6087	polygon	published	860	Rabinowitz, A., Schaller, G. & Uga, U. 1995 A survey to assess the status of Sumatran rhinoceros and other large mammal species in Tamanthi Wildlife Sanctuary, Myanmar. Oryx 29, 123-128.	peer_rev_pub
430					1	China	South West Yunnan	23.1368	100.515	polygon	published	1080	Smith, A.T.X., Y. . 2013 Mammals of China. pp. 400, Princeton University Press.	book
421		2002			1	Cambodia	Seima Biodiversity Conservation Area	12.3454	106.845	polygon		1074	Pollard, E., Clements, T, Hor, NM, Ko, Sok, Rawson, B. 2007 Status and Conservation of Globally Threatened Primates in the Seima Biodiversity Conservation Area, Cambodia. pp. 54.	published_report
420	2	2010	4	2010	1	Myanmar	Taku Aw	10.7726	98.2561	point		1071	Soe, K.M. 2010 Lampi Marine National Park - Mammal Survey Team Research Report. pp. 18. Myanmar.	published_report
416	5	1999	8	1999	1	Myanmar	Htamanthi Wildlife Santuary	25.4163	95.5325	polygon		1070	Wildlife Conservation Society; http://www.ibiblio.org/obl/docs2/MyanmarReport1.pdf; Accessed: 15.07.14	website
417	8	1999	1	2000	1	Myanmar	Mahamyaing Reserved Forest	23.3255	94.6617	polygon		1070	Wildlife Conservation Society; http://www.ibiblio.org/obl/docs2/MyanmarReport1.pdf; Accessed: 15.07.14	website
418	5	2000	7	2000	1	Myanmar	Paunglaung Catchment Area	20.1953	96.4992	polygon		1070	Wildlife Conservation Society; http://www.ibiblio.org/obl/docs2/MyanmarReport1.pdf; Accessed: 15.07.14	website
419	6	2000	9	2000	1	Myanmar	Panlaung Pyadalin Cave Wildlife Santuary	21.0336	96.3591	polygon		1070	Wildlife Conservation Society; http://www.ibiblio.org/obl/docs2/MyanmarReport1.pdf; Accessed: 15.07.14	website
